RESEARCH ARTICLE

# Stress combined with loss of the *Candida albicans* SUMO protease Ulp2 triggers selection of aneuploidy via a two-step process

Marzia Rizzo<sup>1</sup>, Natthapon Soisangwan<sup>2</sup>, Samuel Vega-Estevez<sup>1</sup>, Robert Jordan Price<sup>3</sup>, Chloe Uyl<sup>1</sup>, Elise Iracane<sup>1</sup>, Matt Shaw<sup>1</sup>, Jan Soetaert<sup>4</sup>, Anna Selmecki<sup>2</sup>, Alessia Buscaino<sup>1\*</sup>

**1** University of Kent, School of Biosciences, Kent Fungal Group, Canterbury Kent, United Kingdom, **2** University of Minnesota, Department of Microbiology and Immunology, Minneapolis, Minnesota, United States of America, **3** Cambridge Crop Research, NIAB, Cambridge, United Kingdom, **4** Blizzard Advanced Light Microscopy (BALM), Queen Mary University of London, United Kingdom

\* [A.Buscaino@kent.ac.uk](mailto:A.Buscaino@kent.ac.uk)

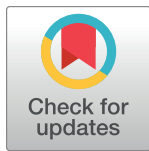

**OPEN ACCESS**

**Citation:** Rizzo M, Soisangwan N, Vega-Estevez S, Price RJ, Uyl C, Iracane E, et al. (2022) Stress combined with loss of the *Candida albicans* SUMO protease Ulp2 triggers selection of aneuploidy via a two-step process. *PLoS Genet* 18(12): e1010576. <https://doi.org/10.1371/journal.pgen.1010576>

**Editor:** Gary P. Moran, Trinity College, Dublin, IRELAND

**Received:** September 14, 2022

**Accepted:** December 16, 2022

**Published:** December 27, 2022

**Peer Review History:** PLOS recognizes the benefits of transparency in the peer review process; therefore, we enable the publication of all of the content of peer review and author responses alongside final, published articles. The editorial history of this article is available here: <https://doi.org/10.1371/journal.pgen.1010576>

**Copyright:** © 2022 Rizzo et al. This is an open access article distributed under the terms of the [Creative Commons Attribution License](https://creativecommons.org/licenses/by/4.0/), which permits unrestricted use, distribution, and reproduction in any medium, provided the original author and source are credited.

**Data Availability Statement:** Illumina genome sequencing data have been deposited in the Sequence Read Archive (<https://www.ncbi.nlm.nih.gov/sra/docs/>) under BioProject PRJNA781758.

## Abstract

A delicate balance between genome stability and instability ensures genome integrity while generating genetic diversity, a critical step for evolution. Indeed, while excessive genome instability is harmful, moderated genome instability can drive adaptation to novel environments by maximising genetic variation. *Candida albicans*, a human fungal pathogen that colonises different parts of the human body, adapts rapidly and frequently to different hostile host microenvironments. In this organism, the ability to generate large-scale genomic variation is a key adaptative mechanism triggering dangerous infections even in the presence of antifungal drugs. Understanding how fitter novel karyotypes are selected is key to determining how *C. albicans* and other microbial pathogens establish infections. Here, we identified the SUMO protease Ulp2 as a regulator of *C. albicans* genome integrity through genetic screening. Deletion of *ULP2* leads to increased genome instability, enhanced genome variation and reduced fitness in the absence of additional stress. The combined stress caused by the lack of *ULP2* and antifungal drug treatment leads to the selection of adaptive segmental aneuploidies that partially rescue the fitness defects of *ulp2Δ/Δ* cells. Short and long-read genomic sequencing demonstrates that these novel genotypes are selected via a two-step process leading to the formation of novel chromosomal fragments with breakpoints at microhomology regions and DNA repeats.

## Author summary

In living organisms, the genome is a double-stranded molecule that carries genes. Genes can encode for proteins, the building blocks of life, and protein levels must be tightly balanced. Consequently, genome organisation must be maintained to ensure the balance of genes. However, this is different in microbial organisms such as the human fungal pathogen *Candida albicans*. Indeed *C. albicans* genome structure can change and this fungus

MinION genome sequencing data have been deposited in the Sequence Read Archive under BioProject PRJNA879282. All other relevant data are within the manuscript and its [Supporting Information](#) files.

**Funding:** This work was supported by BBSRC (BB/T006315/1 to A.B and S.V.E.), a University of Kent GTA PhD studentships (to M.R.), a University of Minnesota UMR Fellowship with the Bioinformatics and Computational Biology program (to N.S), the National Institutes of Health (R01AI143689) and Burroughs Wellcome Fund Investigator in the Pathogenesis of Infectious Diseases Award (#1020388) to A.S. The funders had no role in study design, data collection and analysis, decision to publish, or preparation of the manuscript.

**Competing interests:** The authors have declared that no competing interests exist.

can live without the right proportion of its genes. This genome plasticity allows the selection of new genome organisations with a combination of genes that drives survival in hostile environments that are found in the human host. Understanding how *C. albicans* and other microbial pathogens thrive in the human host requires understanding how novel genome organisations are selected. We identified the SUMO protease Ulp2 as a regulator of *C. albicans* genome integrity through genetic screening. We discovered that *ULP2* deletion increases *C. albicans*' ability to shuffle its genome and loss of *ULP2* combined with antifungal drug treatment results in the selection of novel genomic organisations. We have sequenced the genome of these novel genotypes and discovered new chromosomal fragments that are selected by two temporally separated steps.

## Introduction

Understanding how organisms survive and thrive in changing environments is a fundamental question in biology. Genetic variation is central to environmental adaptation because it facilitates the selection of fitter genotypes better adapted to a new environment. Different types of genetic changes contribute to genetic variability, including (i) whole-chromosome or segmental-chromosome aneuploidy, (ii) translocations and (iii) mutations [1]. Furthermore, diploid cells can undergo loss of heterozygosity (LOH) driven by mitotic events, such as cross-over, gene conversion or meiotic reversion [1,2]. Whole-chromosome or segmental chromosome aneuploidies have the greatest effect on adaptation as they generate copy number variations (CNVs) of multiple genes. These result in divergent phenotypes which may be selectively advantageous [3].

Genome plasticity—the ability to generate large-scale genomic variation—is emerging as a critical adaptive mechanism in human microbial pathogens that need to adapt quickly to extreme environmental shifts because it provides genetic diversity upon which selection can act [4–8]. One such organism is *Candida albicans*, a common human fungal pathogen and a prevalent cause of death due to systemic fungal infections [9]. *C. albicans* is part of the normal microbiota of most healthy individuals but, in immunocompromised individuals, it is a dangerous pathogen causing a wide range of infections, including life-threatening disseminated diseases [10]. Azole antifungal agents, such as fluconazole (FLC), are the most commonly prescribed drugs for treating *C. albicans* infections [9,11,12].

Several lines of evidence suggest that *C. albicans* genome plasticity provides a competitive advantage under host-relevant stress environments. *C. albicans* is a diploid organism with a heterozygous genome organised into  $2 \times 8$  ( $2n = 16$ ) chromosomes (Chr) [13,14]. Seven chromosomes are designated Chr1 to Chr7 according to size, while one is termed ChrR because it contains the *rDNA* locus [15]. Genomic analysis of clinical isolates reveals that many *C. albicans* strains have large-scale genomic changes including segmental and whole chromosome aneuploidies [16–19]. Furthermore, specific chromosomal variants are selected during host-niche colonisation [17,20–25]. Accordingly, many drug-resistant isolates exhibit karyotypic diversity that can confer resistance due to increased copies of specific genes. For example, CNV for the gene *ERG11* encoding for the target of FLC, lanosterol 14- $\alpha$ -demethylase is often observed in drug-resistant isolates [4,16,26–28]. Several studies suggest that *C. albicans* genome instability is not random as it occurs more frequently at specific hotspots which are often repetitive [17,19,23,29,30]. Subtelomeric regions and the *rDNA* locus are among the most unstable genomic sites [17,31]. *C. albicans* subtelomeric regions are enriched in repetitive sequences derived from transposons and protein-coding genes [29,32]. Most notable are the

telomere-associated *TLO* genes, a family of 14 closely related paralogues encoding proteins similar to the Mediator 2 subunit of the Mediator transcriptional regulator [33–35]. Most *TLO* genes are located at subtelomeric regions except *TLO34*, located at an internal locus on the left arm of Chr1 [33]. The *rDNA* locus consists of a tandem array of a ~12 kb unit repeated 50 to 200 times; *rDNA* length polymorphisms frequently occur [14,17].

Despite the clear correlation between genomic variation and environmental adaptation, pinpointing the environmental pressure(s) selecting specific genotypes and understanding how complex karyotypes are formed is often difficult.

In this study, we performed a genetic screening to identify modulators of *C. albicans* genome stability. The screen led to the identification of the *ULP2* gene, encoding for a SUMO protease. *ULP2* deletion causes increased genome instability and enhanced genome variation leading to fitness defects and hypersensitivity to genotoxic agents. We show that loss of *ULP2* combined with exposure to an additional stress (FLC) leads to the selection of multichromosome segmental aneuploidies with adaptive power. Long-read genomic sequencing demonstrates that these novel segmental aneuploidies are selected by a two-step process producing chromosomal fragments with breakpoints at microhomology regions and DNA repeats. Thus, exposure to stress can increase tolerance to unrelated stress by selecting novel complex genotypes.

## Results

### A systematic genetic screen identifies Ulp2 as a regulator of *C. albicans* genotoxic stress response

To identify factors regulating *C. albicans* genome integrity, we utilised a deletion library comprising a subset (674/3000) of *C. albicans* genes that are not conserved in other organisms or have a functional motif potentially related to virulence [36]. As defects in genome integrity lead to hypersensitivity to genotoxic agents [37], the deletion library was screened for hypersensitivity to two DNA damaging agents: Ultraviolet (UV) irradiation which induces formation of pyrimidine dimers [38], and methyl methanesulfonate (MMS), which leads to replication blocks and base mispairing [39]. Genotoxic stress hypersensitivity was semi-quantitatively scored by comparing the growth of treated versus untreated on a scale of 0 to 4, where 0 indicates no sensitivity, and 4 specifies strong hypersensitivity (Fig 1A). The screen identified 28 gene deletions linked to DNA damage hypersensitivity (UV or MMS score  $\geq 2$ ). Of those deletion mutants, 9/28 hits show sensitivity to both UV and MMS, 6/28 hits are sensitive only to UV, and 13/28 hits are sensitive only to MMS (S1 Table). Functional prediction analysis demonstrated that ~43% of the hits are genes predicted to encode components of the DNA damage response pathway (5/28) or for proteins necessary for cell division (7/28) (S1 Table). For example, the top 4 hits of the screen were *GRR1*, *KIP3*, *MEC3* and *RAD18* genes (S1 Table). *C. albicans* *GRR1* and *KIP3* are required for cell cycle progression [40] and mitotic spindle organisation, respectively [41]. Although *C. albicans* *MEC3* and *RAD18* are uncharacterised, they encode for proteins conserved in other organisms that are universally involved in sensing DNA damage (*Mec3*) [42] and in DNA post-replication repair (*Rad18*) [43]. Of the remaining hits, 3/28 genes encode proteins with no apparent ortholog in the two well-studied yeast model systems (*Saccharomyces cerevisiae* and *Schizosaccharomyces pombe*). The last 13 genes encode for proteins with diverse functions, including stress response (*HOG1*) [44], transcriptional and chromatin regulation (*SPT8*, *SIN3*) [45–47], transport and trafficking (*DUR35*, *NPR2*, *FCY2*, *PEP7*, *VAC14*) [48–52], protein folding (*CNE1*) [53], MAP kinase pathway (*STT4*) [54], phosphatase (*PTC2*) [47], immune evasion (*GPD2*) [55] and cell wall biosynthesis (*KRE5*) [56].

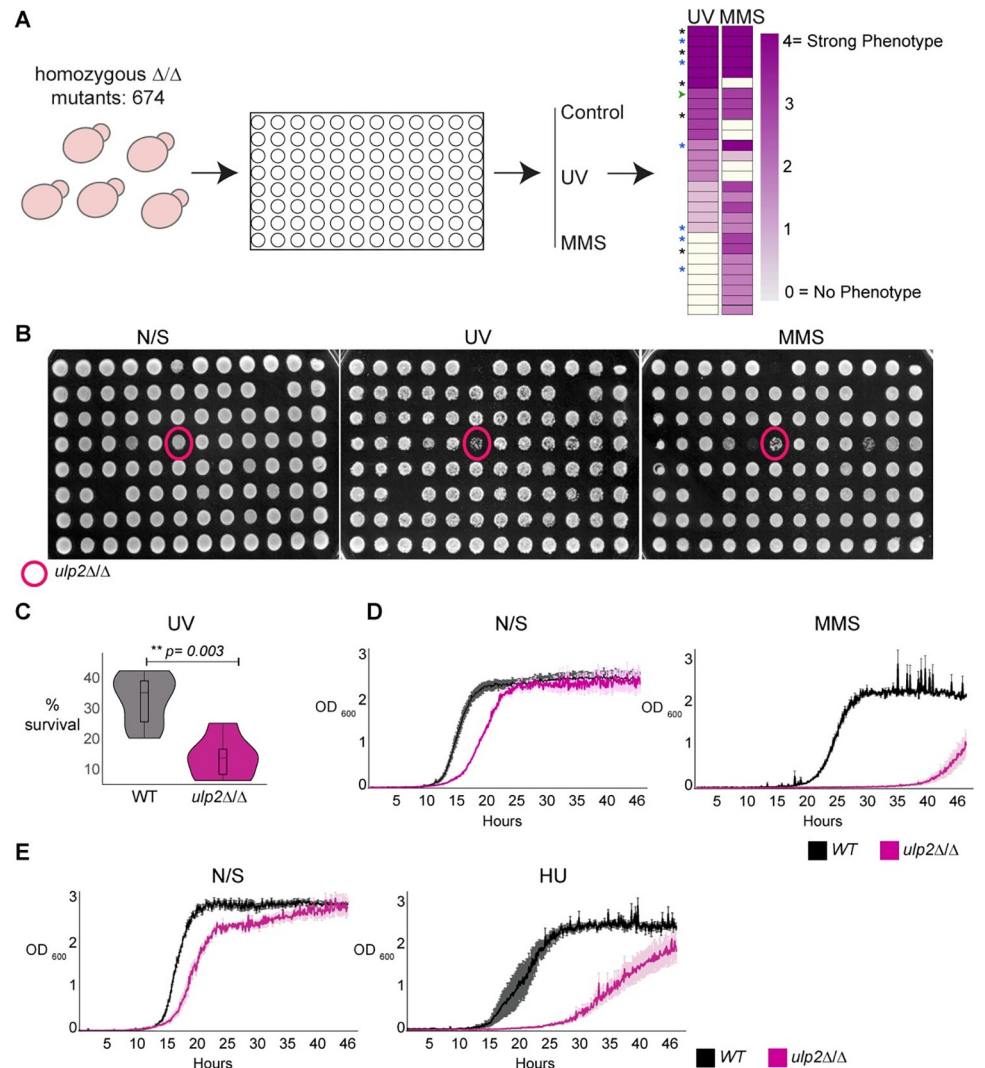

**Fig 1. ULP2 is a regulator of the *C. albicans* genotoxic stress response.** (A) Schematic representation of the screening strategy. 674 *C. albicans* deletion strains were screened for hypersensitivity to UV and MMS. Hypersensitivity was scored by comparing the growth of treated vs untreated on a scale of 0 (white) to 4 (magenta). Black \*: genes encoding for DNA damage and sensing repair pathway components, Blue \*: genes encoding for cell division and chromosome segregation machinery, Green arrow: *ulp2* $\Delta/\Delta$  (B) Data for a plate containing *ulp2* $\Delta/\Delta$  strain (magenta circle). Growth on Non-selective (N/S) media or following UV and MMS treatment is shown (C) Colony-forming unit assay (% survival) of UV treated WT and *ulp2* $\Delta/\Delta$  strain. Statistical analysis was performed using the Kruskal-Wallis test with Mann-Whitney U test for *post hoc* analysis (D) Growth curve of WT and *ulp2* $\Delta/\Delta$  strains grown in non-selective (N/S) and MMS-containing liquid media. Error bars: standard deviation (SD) of three biological replicates (E) Growth curve of WT and *ulp2* $\Delta/\Delta$  strains grown in non-selective (N/S) and HU-containing liquid media. Error bars: standard deviation (SD) of three biological replicates.

<https://doi.org/10.1371/journal.pgen.1010576.g001>

One of the highest-ranked genes on our screen is *ULP2* (CR\_03820C/ *orf19.4353*; MMS score:3, UV score:3) encoding for a SUMO protease (Fig 1A and 1B and S1 Table).

Colony-forming unit (CFU) assays of UV-treated cells confirmed the importance of *C. albicans* *ULP2* in DNA damage resistance as UV treatment reduced the number of CFU in a *ulp2* $\Delta/\Delta$  strain (~14.5% survival) compared to a wild-type (WT) strain (~33.7% survival) (Fig 1C). Furthermore, the *ulp2* $\Delta/\Delta$  strain also displayed a reduced growth rate in liquid media containing MMS or Hydroxyurea (HU), a chemotherapeutic agent that challenges genome

integrity by stalling replication forks [57] (Fig 1D and 1E). Thus, *ULP2* has a role in responding to a wide range of genotoxic agents.

### ***ULP2* but not *ULP1* is required for survival under stress**

*C. albicans* contains three putative SUMO-deconjugating enzymes: Ulp1, Ulp2 and Ulp3 (Fig 2A). Sequence comparison between the three *C. albicans* Ulp proteins and the two well-characterised *S. cerevisiae* Ulp1 and Ulp2 reveals that although the *C. albicans* proteins are poorly conserved, the amino acid residues essential for catalytic activity are conserved (Fig 2A and 2B). Accordingly, recombinantly expressed *C. albicans* Ulp1, Ulp2 and Ulp3 have SUMO-processing activity *in vitro* [58]. Similarly to *S. cerevisiae* *ULP1*, *C. albicans* *ULP3* is an essential gene and was not investigated further in this study [59,60]. Previous studies failed to detect a poly-histidine tagged Ulp2 protein by Western blot analyses of *C. albicans* protein extracts [58]. These results suggested that Ulp2 is unstable or expressed at undetectable low levels. We reassessed Ulp2 protein levels by generating strains expressing, at the endogenous locus, an epitope-tagged Ulp2 protein (Ulp2-HA). Western blot analyses show that Ulp2-HA expression is readily detected in extracts from four independent integrant strains (Fig 2C). Thus, a stable Ulp2 protein is expressed in cells grown under standard laboratory growth conditions (YPD, 30°C). To assess whether *ULP1*, similarly to *ULP2*, is involved in genotoxic stress response, we engineered homozygous deletion strains for *ULP1* (*ulp1Δ/Δ*) and *ULP2* (*ulp2Δ/Δ*). Growth analysis demonstrated that deletion of *ULP2* reduces fitness as the newly generated *ulp2Δ/Δ* strain is viable, but cells are slow-growing (Fig 2D and 2E). In contrast, the *ulp1Δ/Δ* strain grows similarly to the WT control in solid and liquid media (Fig 2D and 2E). Spot dilution assay confirmed that *ULP2* is an important regulator of *C. albicans* stress response as, similarly to the deletion library mutant, the newly generated *ulp2Δ/Δ* strain was sensitive to different stress conditions including treatment with DNA damaging agents (UV and MMS), DNA replication inhibitor (HU), oxidative stress (H<sub>2</sub>O<sub>2</sub>) and high temperature (39°C) (Fig 2E). In contrast, deleting *ULP1* did not cause any sensitivity to the tested stress conditions (Fig 2E).

Although *ULP-1*, *ULP-2* and *ULP-3* may have some partially redundant functions, our results suggest that *ULP-1* does not play a major role in genotoxic stress response. In summary, loss of *ULP2* leads to poor growth in standard laboratory growth conditions and hypersensitivity to multiple stresses.

### **Genome instability is exacerbated in the absence of *ULP2***

To assess whether the hypersensitivity to DNA damage agents observed in the *ulp2Δ/Δ* strain was indeed due to enhanced genome instability, we deleted *ULP2* from a set of strains containing a heterozygous *URA3*<sup>+</sup> marker gene inserted in three different chromosomes (Chr 1, 3 and 7) [61]. We quantified the frequency of *URA3*<sup>+</sup> marker loss by plating on media containing the counter-selective drug 5-Fluoroorotic Acid (FOA) and scoring the number of colonies able to grow on FOA-containing media compared to non-selective (N/S) media. Deletion of *ULP2* caused a dramatic increase in LOH rate at all three chromosomes (Chr1: 378X, Chr3: 18X, Chr7: 96X), indicating that *ULP2* is required for maintaining genome stability across the *C. albicans* genome (Fig 3A). In *C. albicans*, hypersensitivity to genotoxic stress leads to filamentous growth [37,62–65]. Accordingly, the *ulp2Δ/Δ* strain formed wrinkled colonies on solid medium and displayed a higher frequency of abnormal morphologies than the WT strain, including filamentous cells (Fig 3B and 3C). To assess whether the exacerbated *ulp2Δ/Δ* genome instability is linked to defective chromosome segregation, we deleted the *ULP2* gene in a reporter strain in which *TetO* sequences are integrated adjacent to the centromere on Chr7 (*CEN7*) and a TetR-GFP fusion protein is expressed from the gene-free *NEUT5L* locus



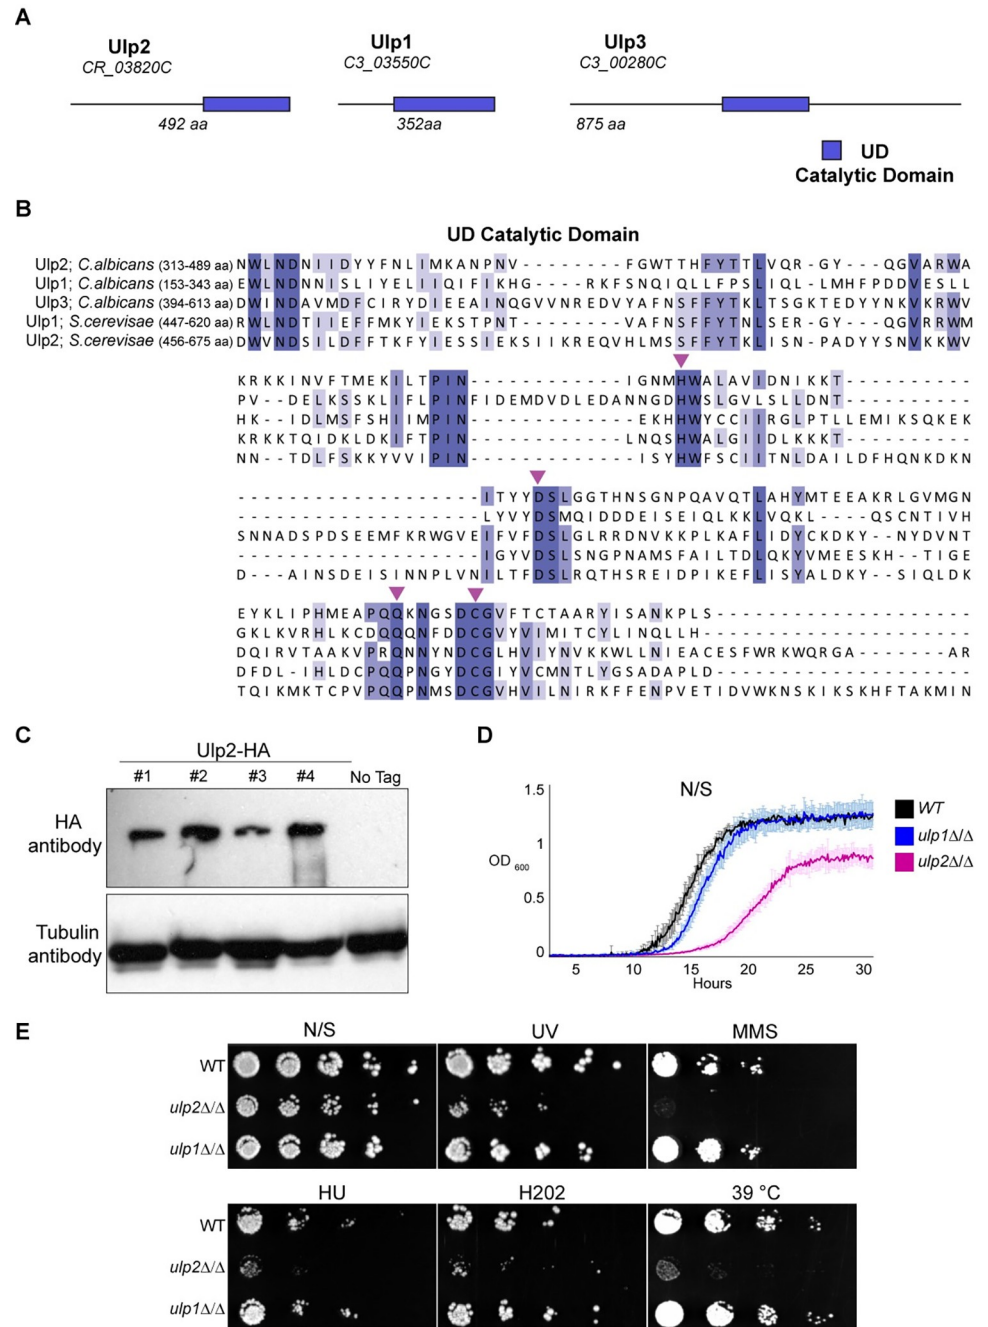

**Fig 2. ULP2 is necessary for survival under stress.** (A) Schematic representations of *C. albicans* Ulp1, Ulp2 and Ulp3 proteins. The systematic name and the amino acid (aa) number is indicated for each protein. Blue box: putative catalytic UD SUMO protease domain (B) Protein alignment of *C. albicans* Ulp proteins (Ulp1, Ulp2 and Ulp3) and *S. cerevisiae* Ulp2 proteins (Ulp1 and Ulp2). Magenta arrows: amino acids essential for SUMO protease activity (C) Western blot analysis of 4 ULP2-HA integrants and the progenitor untagged control (No Tag). *Top*: anti-HA Western blot, *Bottom*: anti-Tubulin Western blot serving as a loading control (D) Growth curves of WT, *ulp1Δ/Δ* and *ulp2Δ/Δ* strains grown in non-selective (N/S) liquid media. Error bars: standard deviation (SD) of three biological replicates (E) Serial dilution assay of WT, *ulp1Δ/Δ* and *ulp2Δ/Δ* strains grown in unstressed (N/S) or stress (UV, MMS, HU, H2O2 and 39°C) growth conditions.

<https://doi.org/10.1371/journal.pgen.1010576.g002>

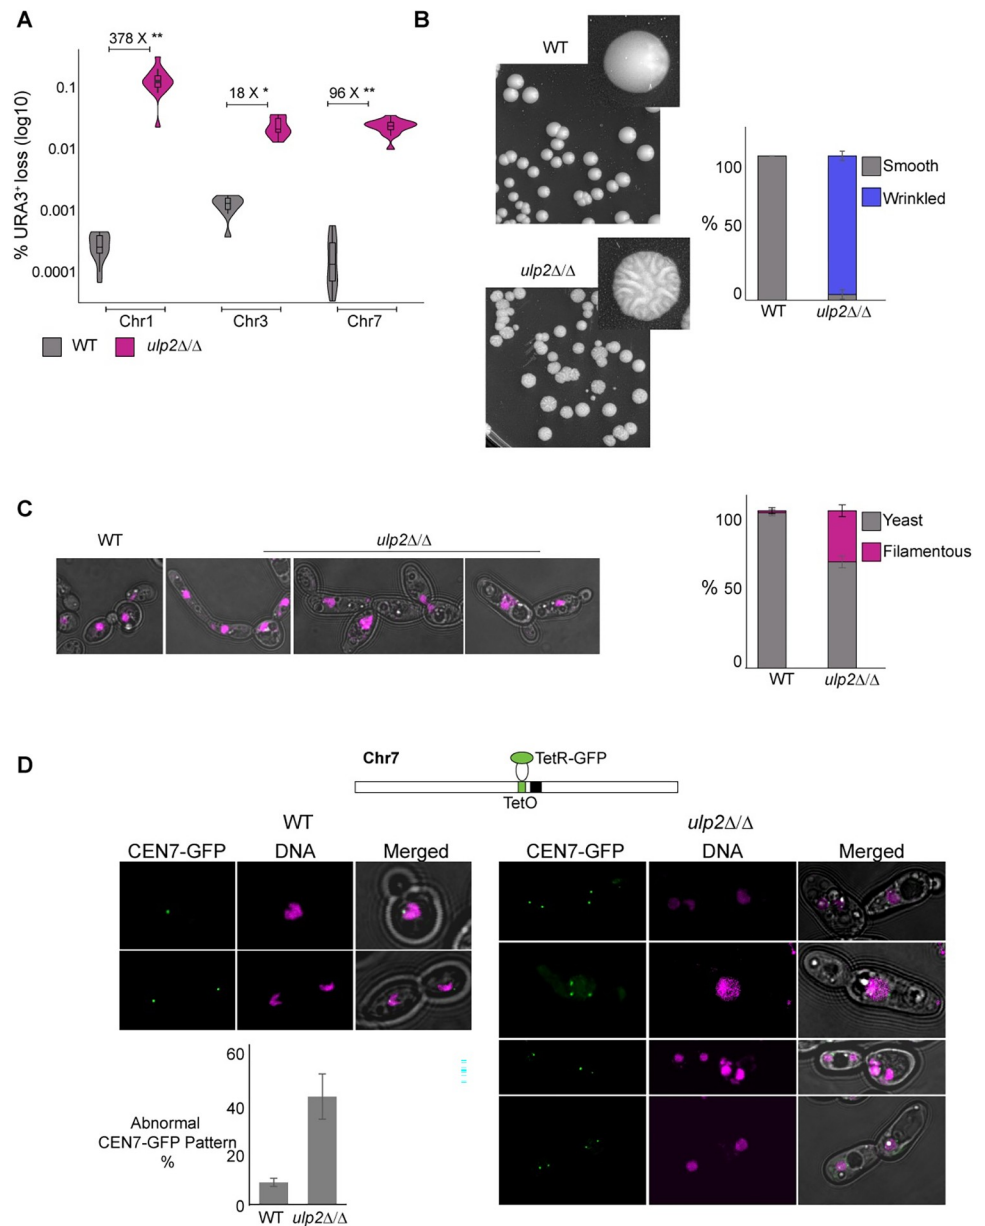

**Fig 3. Loss of ULP2 leads to increased genome instability.** (A) Quantification (%) of loss of a heterozygous *URA3<sup>+</sup>* marker gene inserted in Chr1, Chr3 and Chr7 in WT and *ulp2Δ/Δ* strain. The fold difference of *URA3<sup>+</sup>* marker loss between *ulp2Δ/Δ* and WT strains is indicated. Statistical differences were calculated using the Kruskal-Wallis test and the Mann-Whitney U test for *post hoc* analysis \*\*: Chr1 (4.11 E-07) and Chr7 (6.74 E-05) p-value, \*: Chr3 (2.87 E-02) p-value (B) *Left*: Representative images displaying colony morphologies of WT and *ulp2Δ/Δ* strains. *Right*: Quantification (%) of smooth and wrinkled colonies in WT and *ulp2Δ/Δ* strains (C) *Left*: Representative images displaying the morphologies of WT and *ulp2Δ/Δ* strains. *Right*: Quantification (%) of yeast and filamentous morphologies in WT and *ulp2Δ/Δ* strains. Error bar: Standard deviation of 3 biological replicates (D) *Top*: schematics of the *CEN7* TetO and TetR-GFP system. *Bottom*: nuclear morphology and segregation pattern of centromere 7 (*CEN7*) in WT and *ulp2Δ/Δ* strain. Quantification (%) of abnormal GFP-CEN7 patterns is indicated. Error bar: Standard deviation of 3 biological replicates.

<https://doi.org/10.1371/journal.pgen.1010576.g003>

[66,67]. The binding of TetR-GFP to *TetO* sequences allowed the visualisation of Chr7 duplication and segregation during the cell cycle. We found that deletion of *ULP2* leads to abnormal Chr7 segregation. This included cells with no TetR-GFP signals or multiple TetR-GFP-foci,

that were ~5 fold higher in the *ulp2Δ/Δ* strain compared to the WT control strain (Fig 3D). Thus, deletion of *C. albicans* *ULP2* leads to increased genome instability.

**ULP2 loss coupled with stress triggers selection of segmental aneuploidies**

Previous studies performed in the model system *S. cerevisiae* demonstrated that loss of *ULP2* leads to the accumulation of a specific multichromosome aneuploidy (amplification of both ChrI and ChrXII). This aneuploidy rescues the lethal defects of *ulp2* deletion by amplification of specific genes on both chromosomes [68,69]. To assess whether loss of *C. albicans* *ULP2* triggers the selection of gross karyotypic abnormalities, we analysed the genome of WT and *ulp2Δ/Δ* strains at the beginning (Day 0) and the end (Day 30) of an *in vitro* evolution experiment where strains were passaged daily for 30 days in rich media (YPD 30°C) (Fig 4A). Clamped homogeneous electrical field (CHEF) electrophoresis analysis did not detect any major chromosome rearrangements in both sets of evolved strains (Fig 4B). To further investigate the impact of *ULP2* loss on genome organisation, we sequenced the genome of 3 randomly selected *ulp2Δ/Δ* colonies by whole genome Illumina sequencing (WGS) and compared their genome to the *C. albicans* reference genome. This analysis revealed that loss of *ULP2* leads to very few (<10 across the 3 isolates) *de novo* mutations (S2 Table). Although we did not detect CNVs, we identified novel LOH tracts on different chromosomes in two of the three sequenced colonies (Fig 4C). For example, chromosome mis-segregation followed by reduplication of the remaining homologue is detected in isolate U1 (U1: ChrR) and the

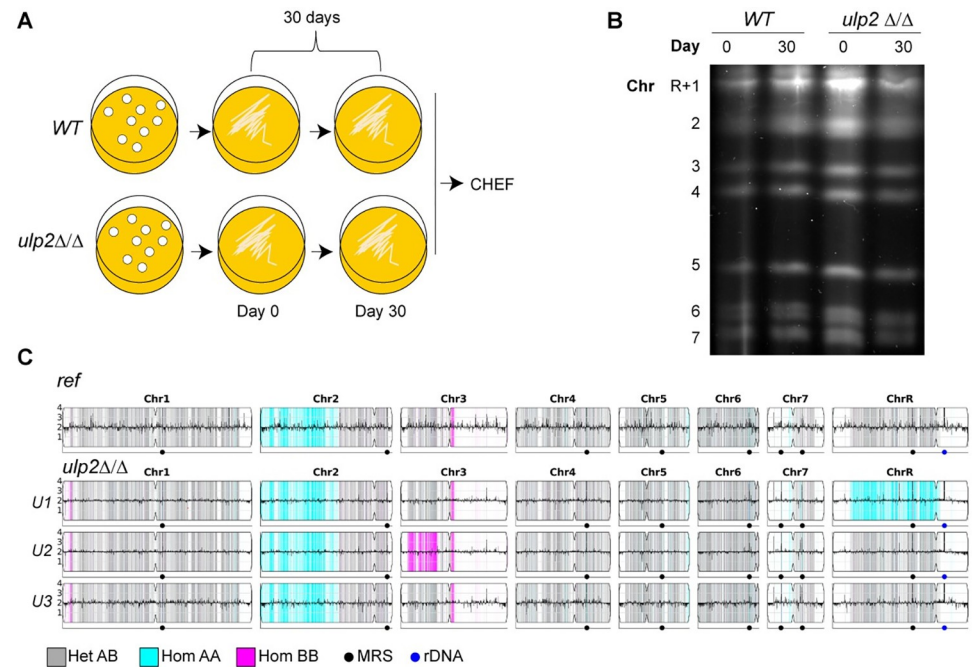

**Fig 4. Karyotypic changes are detected in the absence of ULP2.** (A) Schematics of laboratory evolution strategy (B) Karyotype organisation of *C. albicans* WT and *ulp2Δ/Δ* strains at the start (Day 0) and the end (Day 30) of the evolution experiment (C) Whole genome sequencing analysis of the progenitor (WT:SN152) and three single *ulp2Δ/Δ* colonies (U1, U2, and U3). Data were plotted as the log<sub>2</sub> ratio and converted to chromosome copy number (y-axis, 1–4 copies) as a function of chromosome position (x-axis, Chr1-ChrR) using the Yeast Mapping Analysis Pipeline (YMAP) [109]. Heterozygous (AB) regions are indicated with grey shading, and homozygous regions (loss of heterozygosity) are indicated by shading of the remaining haplotype, either AA (cyan) or BB (magenta).

<https://doi.org/10.1371/journal.pgen.1010576.g004>



genome of U2 contains a long-track LOH (U2:Chr3L) that occurred within 4.6 kb of a repeat locus on Chr3L (*PGA18*, [19]) (Fig 4C). Therefore, loss of *ULP2* can trigger selection of large chromosomal variations. We hypothesised that exposure of *ulp2Δ/Δ* cells to stress could facilitate the selection of novel adaptive karyotypes. To test this hypothesis, we challenged the *ulp2Δ/Δ* strain with high concentrations of FLC (128 μg/ml; ~1000 fold above susceptibility breakpoint [70]) and isolated a FLC-adapted isolate (*FLC-1*) that was still able to grow at high drug concentration following two passages (T1 and T2) in non-selective (N/S) media (Fig 5A and 5B). The phenotypes associated with the loss of *ULP2* were partially rescued in *FLC-1*, as this isolate was less sensitive than the *ulp2Δ/Δ* progenitor to UV treatment and high temperature (39°C) (Fig 5B). Furthermore, fewer wrinkled colonies are present in *FLC-1* than *ulp2Δ/Δ* and the number of elongated cells was reduced in *FLC-1* compared to *ulp2Δ/Δ* (Fig 5C and 5D).

To identify mutations that underlie the above phenotypes, we sequenced the genome of three *FLC-1* single colonies (*FLC-1a*, *b* and *c*) by Illumina technology (Figs 5A and S1 and S3–S5 Tables). We also sequenced the genome of 3 additional *ulp2Δ/Δ* FLC-adapted isolates (*FLC-2*, *FLC-3* and *FLC-4*) randomly selected from FLC plates and unable to grow at high FLC doses following passaging in N/S medium. The whole-genome sequencing revealed that the FLC-adapted colonies have a genotype distinct from the *ulp2Δ/Δ* progenitor (Fig 5E and S3 Table). *FLC-1*, but not *FLC-2*, *FLC-3*, or *FLC-4* isolates, is marked by a segmental aneuploidy: a partial Chr1 amplification (~1.3 Mbp) containing 535 protein-coding genes (Fig 5E and S4 Table). Furthermore, all sequenced isolates have a partial deletion (~388 Kb) of the right arm of ChrR (ChrRR-Deletion). ChrRR-deletion occurs at the ribosomal DNA and extends to the right telomere of ChrR (ChrR:1,897,750 bp—2,286,380 bp), reducing the copy number of 204 genes from two to one (Fig 5E and S5 Table). In contrast, we detected very few (<10) *de novo* point mutations, and none of these are common among all the sequenced FLC isolates (S3 Table). Thus, exposure to an antifungal drug triggers the selection of adaptive chromosomal variations in the absence of *ULP2*.

### Segmental aneuploidy is selected via a two-step process

Illumina sequencing is an inadequate technology for resolving complex chromosomal abnormalities because of the generated short reads. For example, we could not establish whether the increased Chr1 CNV was due to the formation of an extrachromosomal fragment or to a chromosomal fusion. Therefore, to understand further the genomic structure of *FLC-1* we sequenced the genome of this isolate using long-read Oxford Nanopore Technologies (ONT) sequencing. To establish the temporal trajectory of *FLC-1* aneuploidies, timepoints T1 (1X passage in non-selective media following FLC treatment) and T2 (2X passages in non-selective medium following FLC treatment) were sequenced (Fig 5A). Using this method, we could resolve the structure of *FLC-1* aneuploidies completely (Fig 6A). We discovered that *FLC-1* contains, in addition to the two endogenous Chr1 homologous chromosomes, an extra linear Chr1 (linChr1) copy that is selected in a two-step process. At time T1, we detected a linChr1 (~1.9 Mbp) containing an intact right arm and a truncated left arm (Fig 6B). At the 5' breakpoint, Chr7 subtelomeric and telomeric regions are fused to Chr1. This chromosomal fusion occurs within the internal *TLOα34* gene deleting ~1.3 Mbp. Sequence homology between *TLOα34* and the subtelomeric *TLOγ16* gene is likely to have guided the fusion between Chr1 and Chr7. At T2, linChr1 is further processed at its right arm by deletion of ~0.6 Mbp and the addition of telomeric repeats (Fig 6B). The 3' breakpoint contains a microhomology tract (6 bp 5'-TTCTTG-3') between internal sequences of Chr1 and telomeric repeats. The resulting linChr1 spans the centromere and is flanked by terminal telomeric repeats. To assess whether

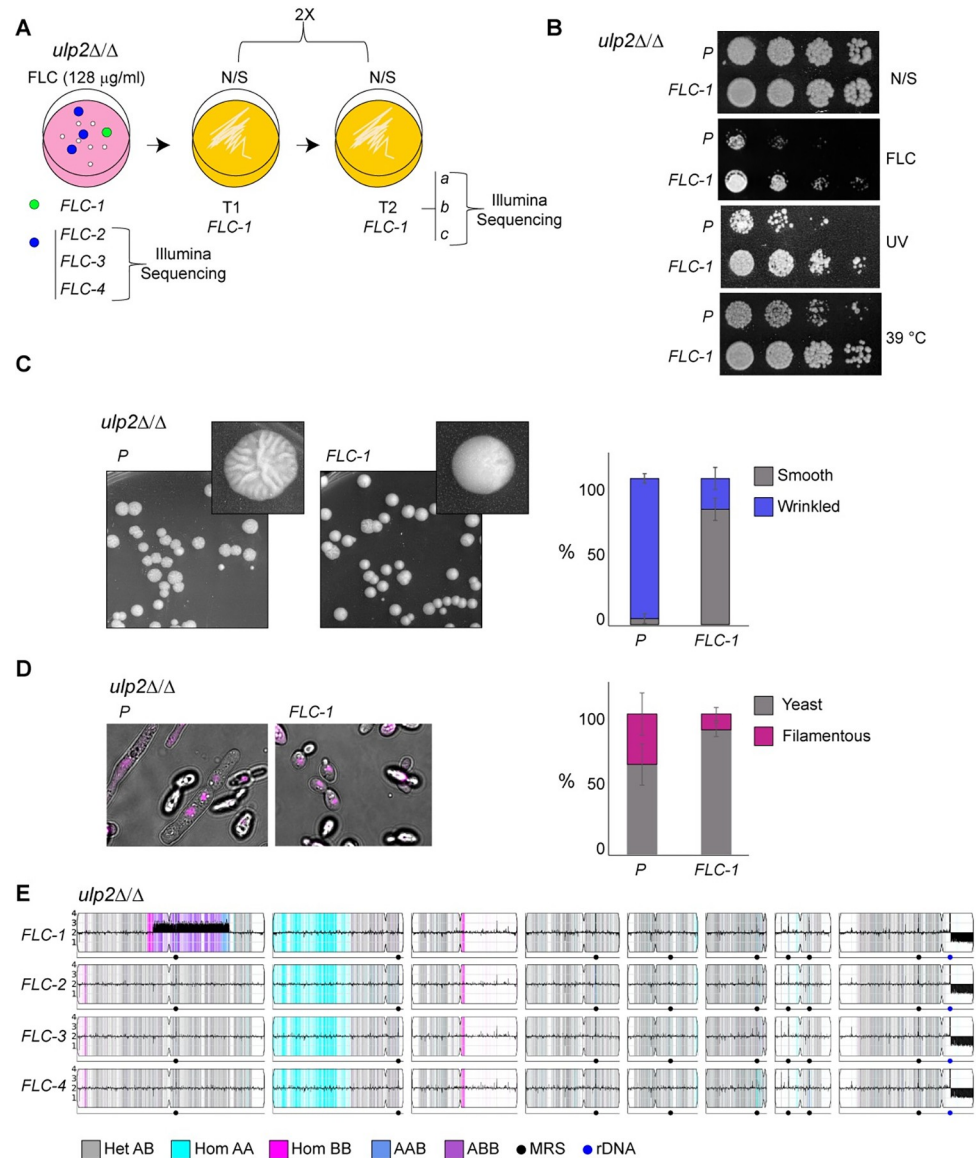

**Fig 5. Genomic variants are selected in *ulp2Δ/Δ* cells challenged with additional stress.** (A) Schematic of experimental design. The *FLC-1 ulp2Δ/Δ* isolate was selected from a casitone agar plate containing 128 μg/ml fluconazole (FLC) passed two times (2X) non-selective (N/S) agar plates and its genome sequenced by Illumina technology. *FLC-2*, *FLC-3* and *FLC-4 ulp2Δ/Δ* isolates were selected from a casitone agar plate containing 128 μg/ml fluconazole (FLC) and the genome was sequenced by Illumina technology. (B) Serial dilution assay of *ulp2Δ/Δ* parental (P) and fluconazole-recovered isolates (*FLC-1*) in unstressed (N/S) or stress (UV, MMS, HU, H<sub>2</sub>O<sub>2</sub> and 39°C) growth conditions. (C) *Left*: Representative images displaying colony morphologies of *ulp2Δ/Δ* parental (P) and fluconazole-recovered isolates (*FLC-1*). *Right*: Quantification (%) of smooth and wrinkled colonies in WT and *ulp2Δ/Δ* strains (D) *Left*: Representative images displaying the morphologies of *ulp2Δ/Δ* parental (P) and fluconazole-recovered isolates (*FLC-1*). *Right*: Quantification (%) of yeast and filamentous morphologies in WT and *ulp2Δ/Δ* strains. Error bar: Standard deviation of 3 biological replicates (E) Whole genome sequencing data for four single colonies isolated from 128 μg/ml fluconazole plates (*FLC1-FLC4*). The chromosome copy number is plotted along the y-axis (1–4 copies).

<https://doi.org/10.1371/journal.pgen.1010576.g005>

linChr1 was necessary for the *ulp2Δ/Δ* phenotypic rescue, we passed *FLC-1* in N/S media and selected three independent phenotypic revertants (*R-1*, *R-2* and *R-3*) that, similarly to the *ulp2Δ/Δ* strain, are less able to withstand FLC and form wrinkled colonies on solid media (Fig 6C and 6D). Diagnostic PCR analysis with primers specific for linChr1 indicates that linChr1

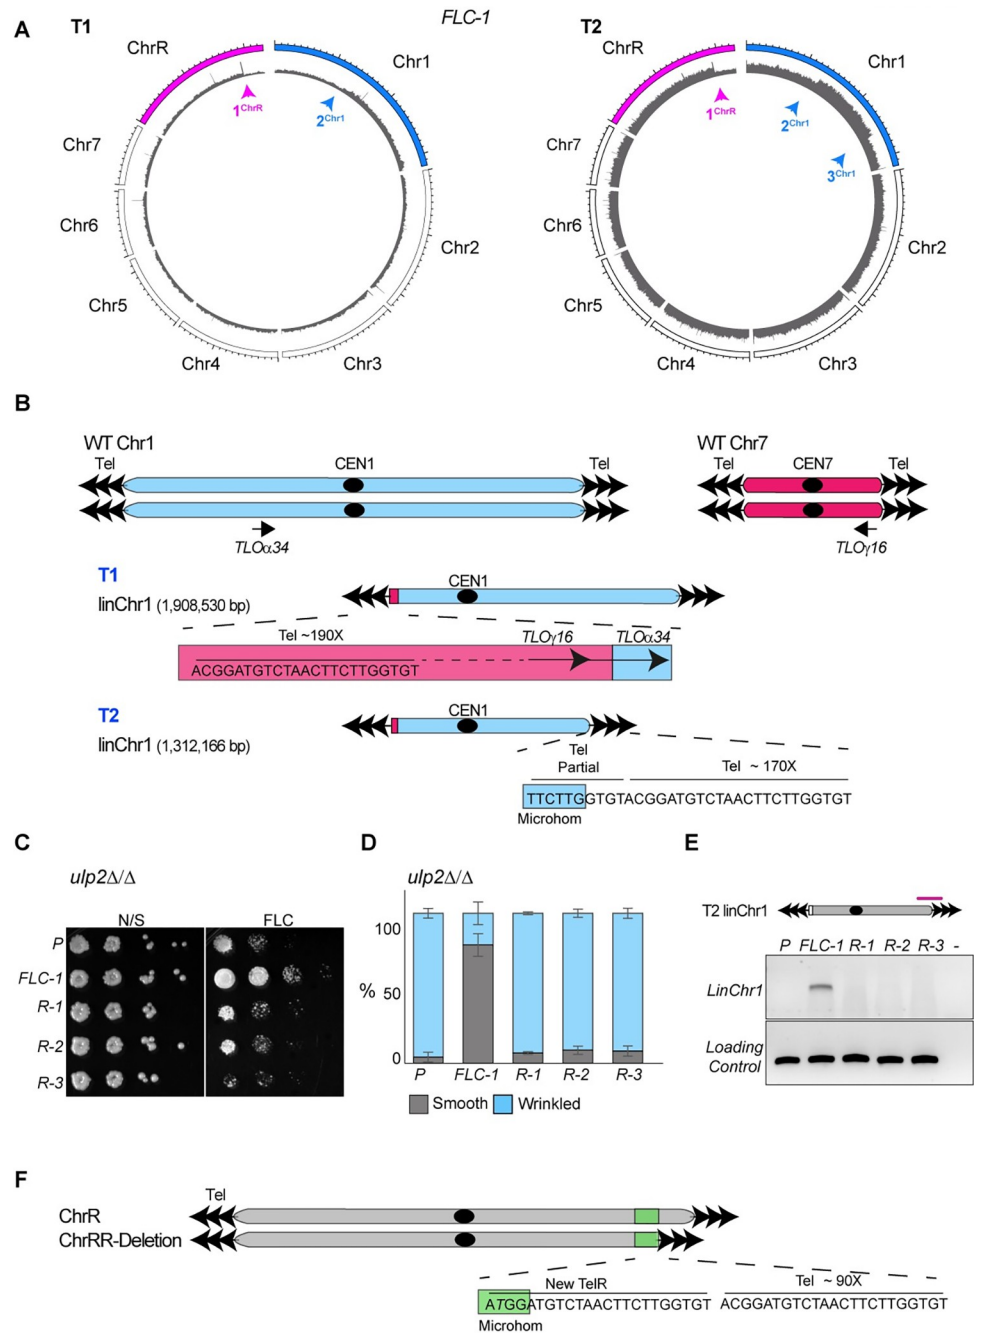

**Fig 6. Microhomology tracts and DNA repeats drive the formation of segmental aneuploidies.** (A) Circular plots of the long-read coverage across the *FLC-1* genome at timepoint T1 (left) and T2 (right). Magenta and Blue arrows: CNV breakpoints on ChrR and Chr1 respectively (B) Schematics of the events leading to linChr1 formation. *Top*: Schematics of the endogenous Chr1 and Chr7. *Middle*: Schematics of linChr1 structure at timepoint T1. *Bottom*: Schematics of linChr1 structure at timepoint T2. Tel: telomeric repeats. Microhom: microhomology tract found on Chr1 and telomeric repeats. (C) Serial dilution assay of *ulp2* $\Delta/\Delta$  parental (P) fluconazole-recovered (*FLC-1*) and *FLC-1* revertants (*R-1*, *R-2* and *R-3*) isolates in non-selective (N/S) agar plate or plates containing 128  $\mu$ g/ml fluconazole (FLC) (D) Quantification (%) of smooth and wrinkled colonies in *ulp2* $\Delta/\Delta$  parental (P) fluconazole-recovered (*FLC-1*) and *FLC-1* revertants (*R-1*, *R-2* and *R-3*) isolates (E) *Top*: Schematics of linChr1 highlighting the position (magenta line) of linChr1 specific primer. *Bottom*: LinChr1 diagnostic PCR in the *ulp2* $\Delta/\Delta$  parental (P), fluconazole-recovered (*FLC-1*) and *FLC-1* revertants (*R-1*, *R-2* and *R-3*) isolates. Loading Control: Chr1 internal primers (F) Schematics of ChrRR-deletion. Tel: telomeric repeats Microhom: microhomology tract found on ChrR and telomeric repeats.

<https://doi.org/10.1371/journal.pgen.1010576.g006>

was lost in the *R-1*, *R-2* and *R-3* revertants, while an amplification product was detected in DNA isolated from *FLC-1* (Fig 6E). This result suggests that linChr1 has an adaptive value.

Finally, we discovered that the ChrRR-deletion is selected early following FLC treatment as this deletion is present at timepoint T1 and T2 (Fig 6A). A microhomology tract between the *RDN18* (encoding for the 18S rRNA) genes and telomeric repeats facilitated the addition of telomeric repeats to one copy of the *RDN18* gene stabilising the truncated chromosome (Fig 6E). Thus, rearrangements at microhomology regions and DNA repeats guide the formation of adaptive segmental aneuploidies via two temporally separated events.

## Discussion

There is a significant gap in our understanding of how, in microbial organisms, genome instability leads to increased fitness in stress and non-stress environments. Here, we identified the SUMO protease Ulp2 as a key protein ensuring genome stability in *C. albicans*. We demonstrated that *ULP2* loss leads to enhanced genome variation and that dysregulation of the SUMO system combined with drug treatment facilitates the selection of adaptive segmental aneuploidies via a two-step process.

### Ulp2 is a critical regulator of *C. albicans* genome stability

SUMOylation is a post-translational protein modification signalling in a large number of cellular processes by targeting nuclear eukaryotic proteins [71–74]. SUMO peptides are covalently attached to target proteins by the concerted action of E1, E2 and E3 enzymes while SUMOylation is reversed by SUMO-specific proteases [75–79]. We discovered that the SUMO protease Ulp2 promotes genome stability in *C. albicans*. These findings are consistent with the emerging role of SUMO proteases as a guardian of genome integrity across eukaryotes. Indeed, SUMO proteases ensure genome stability throughout eukaryotes [68,80]. We hypothesise that *C. albicans* *ULP2* promotes genome stability by modulating SUMO levels of several substrates including: (i) kinetochore and centromere-associated proteins, (ii) the DNA replication machinery and (iii) factors involved in DNA repair. Indeed, it is well established that SUMO homeostasis modulates kinetochore function, DNA replication and DNA repair and that defects in these pathways lead to exacerbated genome instability [77,78,81,82]. For example, several *S. cerevisiae* kinetochore and centromere-associated proteins, including the centromeric-specific histone H3 variant Cse4<sup>CENP-A</sup>, are SUMOylated and the knockdown of SENP6, the human ortholog of Ulp2, leads to mis-localisation of the inner kinetochore complex CENP-H/I/K causing chromosome segregation defects [74,83–85]. Furthermore, SUMOylation of replication and repair proteins increases upon DNA damage [74,83,86–89]. We still know very little about SUMOylation effect on *C. albicans* biology and its adaptation to hostile host environments. However, the observation that *C. albicans* protein SUMOylation patterns are different in normal and stress growth conditions agrees with our data and suggests that this post-translation modification has a critical role in adaption [90].

### The adaptive power of segmental aneuploidy to overcome multiple stresses

It is well established that exposure to moderate stress can increase tolerance to unrelated stresses [91,92]. This increased tolerance is usually the result of coordinated gene expression changes known as the core stress response [91]. In contrast, we show that exposure to a stress (antifungal drug) can increase tolerance to unrelated stress (loss of *ULP2*) by selecting segmental aneuploidies. We demonstrate that two different segmental aneuploidies can co-exist when *ulp2Δ/Δ* cells are challenged with FLC: an amplification of a Chr1 fragment via the formation of an extra chromosome (linChr1) and a partial deletion of ChrR. We posit that these changes

in karyotype provide a synergistic fitness advantage in response to the two independent stressors (the presence of FLC and lack of *ULP2*) by simultaneously changing the copy number of multiple genes. Indeed, linChr1 amplifies 535 protein-coding genes ([S4 Table](#)) and GO analyses demonstrated that 41 of those genes are associated with a “response to drug” phenotype ([S6 Table](#)). Among these, amplification of *UPC2* encoding for the Upc2 transcription factor is likely to be critical. Indeed, it is well established that *UPC2* overexpression leads to FLC resistance by *ERG11* transcriptional upregulation [[93,94](#)]. Similarly, amplification of *CCR4* and *NOT5* (part of linChr1) might play a key role in rescuing the fitness defects of the *ulp2Δ/Δ* strain. Ccr4 and Not5 are subunits of the evolutionarily conserved Ccr4-Not complex that modulate gene expression at multiple levels, including transcription initiation, elongation, de-adenylation and mRNA degradation [[95](#)]. It has been shown that *S. cerevisiae* *CCR4* and *NOT5* overexpression rescues the lethal defects associated with a *ulp2* deletion strain [[68](#)]. Similarly, GO analysis revealed that ChrRR-Deletion leads to a reduced copy number of 34/204 genes associated with “response to stress” and 18/204 genes are linked to “response to drug” ([S7 Table](#)).

### Selection of segmental aneuploidies via a two-step process involving microhomology tracts

One key question is to understand how complex novel genotypes are selected in *C. albicans*. We provide evidence that two temporally separated events led to the formation of linChr1 via regions with (micro)homology to telomeric and subtelomeric regions. Our findings support a model in which non-allelic homologous recombination (NAHR) between the *TLOα34* (Chr1) gene and Chr7 subtelomeric sequences resulted in a first deletion on Chr1 that is stabilised by the addition of Chr7 telomeric regions. We propose that, in a second step, microhomology-mediated break-induced replication (MMBIR) involving a microhomology region (6 bp 5'-TTCTTG-3') between internal sequences of Chr1 (position Chr1: 2594815–2594820 bp) and the 23 bp telomeric repeats caused the second Chr1 deletion and addition of telomeric repeats. We hypothesise that MMBIR is also responsible for the stabilisation of ChrRR-deletion. Indeed, a microhomology tract (4 bp AxGG) between the *RDN18* regions and telomeric repeats is found at ChrRR-deletion breakpoint resulting in the addition of telomeric repeats at the rDNA locus and subsequent stabilisation of the broken chromosome. As MMBIR is caused by stalled replication forks [[96](#)], it is likely that defects in DNA replication trigger MMBIR and aneuploidy selection. We suspect that these mechanistic pathways are common in *C. albicans* and other fungal pathogens. Indeed, complex aneuploidies have been observed in other stress conditions [[30,97,98](#)]. Complex novel karyotypes are most likely the result of independent events that accumulate over time. Furthermore, CNVs downstream of the rDNA locus have been described in *C. albicans* clinical isolates as well as in cells treated with the antifungal posaconazole [[16,30,97](#)]. Analysis of these genotypes by long-read sequencing will be instrumental in fully resolving these karyotypes and unveiling their origins.

## Material and methods

### Yeast strains and growth conditions

Strains used in this study are listed in [S8 Table](#). Routine culturing was performed at 30°C in Yeast Extract-Peptone-D-Glucose (YPD) liquid and solid media containing 1% yeast extract, 2% peptone, 2% dextrose, 0.1 mg/ml adenine and 0.08 mg/ml uridine, Synthetic Complete (SC-Formedium) or Casitone (5 g/L Yeast extract, 9 g/L BactoTryptone, 20 g/L Glucose, 11.5 g/L Sodium Citrate dehydrate, 15 g/L Agar) media. When indicated, media were



supplemented with 1 mg/ml 5-Fluorotic acid (5-FOA, Melford), 200 µg/ml Nourseothricin (clonNAT, Melford), 15 µg/ml and 128 µg/ml fluconazole (Sigma #F8929), 6m H<sub>2</sub>O<sub>2</sub> (Sigma #H1009), 12 mM and 22 mM Hydroxyurea (Sigma #H8627), 0.005% MMS (Sigma #129925).

### Genetic screening

The genetic screening was performed using a *C. albicans* homozygous deletion library [36] arrayed in 96 colony format on YPD plates (145x20 mm) using a replica plater (Sigma #R2508). Control non-selective (N/S) plates were grown at 30°C for 48 hours. UV treatment was performed using UVitec (Cambridge) with power density of 7.5 µW/cm<sup>2</sup> (0.030 J for 4 seconds). Following UV treatment, plates were incubated in the dark at 30°C for 48 hours. For MMS treatment, the library was spotted onto YPD plates (145x20 mm) containing 0.005% MMS and incubated at 30°C for 48 hours. UV and/or MMS sensitivity of selected strains was confirmed by serial dilution assays in control (YPD) and stress (UV: power density of 7.5 µW/cm<sup>2</sup>, MMS: 0.005%) plates. Correct gene deletions were confirmed by PCR using gene-specific primers (S9 Table).

### Yeast strain construction

Integration and deletion of genes were performed by transforming PCR products containing a marker gene and the appropriate target-gene sequence integration site [99]. Oligonucleotides and plasmids used for strain construction are listed in S9 and S10 Tables, respectively. For Lithium Acetate transformation, overnight liquid yeast cultures were diluted in fresh YPD and grown to an OD<sub>600</sub> of 1.3. Cells were harvested by centrifugation and washed once with dH<sub>2</sub>O and once with SORB solution (100 mM Lithium acetate, 10 mM Tris-HCl pH 7.5, 1 mM EDTA pH 7.5/8, 1M sorbitol; pH 8). The pellet was resuspended in SORB solution containing single-stranded carrier DNA (Sigma-Aldrich) and stored -80°C in 50 µl aliquots. Frozen competent cells were defrosted on ice, mixed with 5 µL of PCR product and 300 µL PEG solution (100 mM Lithium acetate, 10 mM Tris-HCl pH 7.5, 1 mM EDTA pH 8, 40% PEG4000). Following incubation for 21–24 hours at 30°C, cells were heat-shocked at 44°C for 15 minutes and grown in 5 mL YPD liquid for 6 hours before plating on selective media at 30°C.

### UV survival quantification

Following dilution of overnight liquid cultures, 500 cells were plated in YPD control plates and 1500 cells were plated in YPD stress plates and UV irradiated with a power density of 7.5 µW/cm<sup>2</sup> (0.030 J for 4 seconds). Plates were incubated at 30°C for 48 hours in the dark. Colonies were counted using a colony counter (Stuart Scientific). Experiments were performed in 5 biological replicates, and violin plots were generated using R and R Studio IDE (<http://www.r-project.org/>).

### Growth curve

Overnight liquid cultures were diluted to 60 cells/µL in 100 µL YPD and incubated at 30°C in a 96 well plate (Cellstar, #655180) with double orbital agitation of 400 rpm using a BMG Labtech SPECTROstar nanoplate reader for 48 hours. When indicated, YPD media was supplemented with MMS (0.005%) and HU (22 mM). Graphs show the mean of 3 biological replicates, error bars show the standard deviation.

### Serial dilution assay

Overnight liquid cultures were diluted to an OD<sub>600</sub> of 4, serially diluted 1:5 and spotted into agar plates with and without indicated additives using a replica plater (Sigma Aldrich,

#R2383). Images of the plates were taken using Syngene GBox Chemi XX6 Gel imaging system. Experiments were performed in 3 biological replicates.

### Protein extraction and Western blotting

Yeast extracts were prepared as described [100] using  $1 \times 10^8$  cells from overnight cultures grown to a final  $OD_{600}$  of 1.5–2. Protein extraction was performed in the presence of 2% SDS (Sigma) and 4 M acetic acid (Fisher) at 90°C. Proteins were separated in 2% SDS (Sigma), 40% acrylamide/bis (Biorad, 161–0148) gels and transferred into PVDF membrane (Biorad) by semi-dry transfer (Biorad, Trans Blot SD, semi-dry transfer cell). Western-blot antibody detection was performed using anti-HA mouse monoclonal primary antibody (12CA5 Roche, 5 mg/ml) at a dilution of 1:1000 in PBS containing 0.2% Tween and 5% w/v non-fat dry milk, recombinant anti-alpha Tubulin (Abcam #ab184970) at a dilution of 1:10000 in PBS containing 0.2% Tween and 5% w/v non-fat dry milk, anti-mouse IgG-peroxidase (A4416 Sigma) at dilution of 1:30000, anti-rabbit IgG-peroxidase (A0545 Sigma) at a dilution of 1:30000, and Clarity ECL substrate (Bio-Rad).

### *URA3*<sup>+</sup> marker loss quantification

Strains were first streaked onto synthetic solid media lacking uracil and uridine (SC–Uri) to ensure the selection of cells carrying the *URA3*<sup>+</sup> marker gene. Parallel liquid cultures were grown for 16 hours at 30°C in YPD and plated on SC plates containing 1 mg/ml 5-FOA (5-fluorotic acid; Sigma) and on N/S SC plates. Colonies were counted after 2 days of growth at 30°C. The frequency of the *URA3*<sup>+</sup> marker loss was calculated using the formula  $F = m/M$ , where  $m$  represents the median number of colonies obtained on 5-FOA medium (corrected by the dilution factor used and the fraction of culture plated) and  $M$  the average number of colonies obtained on YPD (corrected by the dilution factor used and the fraction of culture plated) [63]. Statistical differences between results from samples were calculated using the Kruskal-Wallis test and the Mann-Whitney U test for post hoc analysis. Statistical analysis was performed and violin plots were generated using R Studio (<http://www.r-project.org/>).

### Microscopy

30 ml of yeast cultures ( $OD_{600} = 1$ ) grown in SC were centrifuged at 1550 x g for 5 minute and washed once with  $dH_2O$ . Cells were fixed in 10 ml of 3.7% paraformaldehyde (Sigma #F8775) for 15 minutes, washed twice with 10 ml of  $KPO_4$ /Sorbitol (100 mM  $KPO_4$ , 1.2 M Sorbitol) and resuspended in 250  $\mu$ l PBS containing 10  $\mu$ g of DAPI. Cells were then sonicated and resuspended in a 1% low melting point agarose (Sigma Aldrich) before mounting under a 22 mm coverslip of 0,17  $\mu$ m thickness. Samples were imaged on a Zeiss LSM 880 Airyscan with a 63x/1.4NA oil objective. Airyscan images were taken with a relative pinhole diameter of 0.2 AU (airy unit) for maximal resolution and reduced noise. GFP was imaged with a 488 nm Argon laser and 495–550 nm bandpass excitation filter. The DAPI channel was imaged on a PMT with standard pinhole of 1AU and brightfield images were captured on the trans-PMT with the same excitation laser of 405 nm. DAPI and brightfield images were taken with the same pixel size and bit depth (16bit) as the airyscan images. Images were of a 42.7x42.7 $\mu$ m field of view with a 33 nm pixel size resolution. z-stacks were taken containing cells of z interval of 500 nm. Airyscan Veena filtering was performed with the inbuilt algorithms of Zeiss Zen Black 2.3. Experiments were performed in 3 biological replicates and >100 cells/replicate were counted.

## Drug selection

For fluconazole selection, strains were incubated overnight in Casitone liquid media at 30°C with shaking.  $10^4$  cells were plated in a small plate (10 cm) containing Casitone medium plus 256  $\mu$ l DMSO or 128  $\mu$ g/mL fluconazole. Plates were incubated at 30°C for 7 days. Colonies able to grow on fluconazole- were streaked (2X) on non-selective (N/S) plates and tested by spotting assay in Casitone +DMSO, or Casitone+FLC. For selection of *FLC-1* revertants, 100 cells were plated in YPD agar plates and single colonies were assessed for their ability to grow on casitone medium plus 256  $\mu$ l DMSO or 128  $\mu$ g/mL fluconazole by serial dilution assays.

## Contour-clamped homogeneous electric field (CHEF) electrophoresis

Intact yeast chromosomal DNA was prepared as previously described [101]. Briefly, cells were grown overnight, and a volume equivalent to an  $OD_{600}$  of 6 was washed in 50 mM EDTA and resuspended in 20  $\mu$ l of 10 mg/ml Zymolyase 100T (Amsbio #120493–1) and 300  $\mu$ l of 1% Low Melt agarose (Biorad # 1613112) in 100 mM EDTA. Chromosomes were separated on a 1% Megabase agarose gel (Bio-Rad) in 0.5X TBE using a CHEF DRII apparatus. Run conditions were as follows: 60-120s switch at 6 V/cm for 12 hours followed by a 120-300s switch at 4.5 V/cm for 26 hours at 14°C. The gel was stained in 0.5x TBE with ethidium bromide (0.5  $\mu$ g/ml) for 60 minutes and destained in water for 30 minutes. Chromosomes were visualised using a Syngene GBox Chemi XX6 gel imaging system.

## Whole-genome Illumina sequence analysis

Illumina genome sequencing data have been deposited in the Sequence Read Archive under BioProject PRJNA781758. Genomic DNA was isolated using a phenol-chloroform extraction as previously described [26]. Paired-end (2 x 151 bp) sequencing was carried out by the Microbial Genome Sequencing Center (MiGS) on the Illumina NextSeq 2000 platform. Read trimming was conducted using Trimmomatic (v0.33 LEADING:3 Trailing:3 SLIDINGWINDOW:4:15 MINLEN:36 TOPHRED33) [102]. Trimmed reads were mapped to the *C. albicans* reference genome (SC5314 A21-s02-m09-r08) from the *Candida* Genome Database ([http://www.candidagenome.org/download/sequence/C\\_albicans\\_SC5314/Assembly21/archive/C\\_albicans\\_SC5314\\_version\\_A21-s02-m09-r08\\_chromosomes.fasta.gz](http://www.candidagenome.org/download/sequence/C_albicans_SC5314/Assembly21/archive/C_albicans_SC5314_version_A21-s02-m09-r08_chromosomes.fasta.gz)). Reads were aligned to the reference using BWA-MEM (v0.7.17) with default parameters [103]. The BAM files, containing aligned reads, were sorted and PCR duplicates removed using Samtools (v1.10 samtools sort, samtools rmdup) [104]. Qualimap (v2.2.1) analysed the BAM files for mean coverage as aligned to the SC5314 A21 reference genome; coverages ranged from 73.7x to 89.3x coverage [105]. Variant detection was conducted using the Genome Analysis Toolkit (Mutect, v2.2–25), with the SC5314 A21 reference genome as the reference fasta input, and SN152 as the normal bam input [106]. Variants were annotated using SnpEff (V4.3) [107] using the SC5314 A21 reference genome fasta and gene feature file above, and filtered using SnpSift for missense, nonsense, and synonymous mutations. Variants were verified visually using the Integrative Genomic Viewer, and variants present in SN152 were removed. (IGV, v2.8.2) [108].

## Read depth and breakpoint analysis of short-reads sequencing

Whole-genome sequencing data were analysed for copy number and allele ratio changes as previously described [19,30]. Aneuploidies were visualised using the Yeast Mapping Analysis Pipeline (YMAP, v1.0) [109]. BAM files aligned to the SC5314 reference genome as described above were uploaded to YMAP and read depth was determined and plotted as a function of

chromosome position, using the inbuilt SC5314 A21 reference genome and haplotype map. Read depth was corrected for both chromosome-end bias and GC-content. The GBrowse CNV track and allele ratio track identified regions of interest for CNV and LOH breakpoints, and more precise breakpoints were determined visually using IGV. LOH breakpoints are reported as the first and last informative homozygous position in a region that is heterozygous in the parental genome. CNV breakpoints were identified as described previously [19,30].

### Long-read DNA sequencing

Oxford Nanopore Technologies (ONT) sequencing data have been deposited in the Sequence Read Archive under BioProject PRJNA879282. DNA was extracted from an overnight culture in YPD using the QIAGEN genomic tip 100/G kit (Qiagen, #10243) according to manufacturing protocol. Long read sequencing libraries were prepared using the SQK-LSK109 Ligation Sequencing Kit with the EXP-NBD104 Native Barcoding Kit (Oxford Nanopore Technologies) from approximately 1 µg of high molecular weight genomic DNA, following the manufacturer's protocol. Long read libraries were sequenced on R9.4.1 Spot-On Flow cells (FLO-MIN106) using the GridION X5 platform set to super accurate base calling.

### Long-read genome assembly

Long reads were quality controlled using NanoPlot v1.30.1 [110], and adapters and barcodes were trimmed using Porechop v0.2.4 (<https://github.com/rrwick/Porechop>) with default parameters. Reads shorter than 1kb or with a quality score less than Q9 were removed using Filtlong v0.2.1 <https://github.com/rrwick/Filtlong>. Long reads were assembled using NECAT v0.0.1\_update20200803 [111] using a genome size of 16Mb, all other parameters were left as default. Error correction was performed by aligning the long reads to the assemblies with Minimap2 v2.17-r941 [112] to inform one iteration of Racon v1.4.20 [113], followed by one iteration of Medaka v1.5.0 (<https://github.com/nanoporetech/medaka>) using the r941\_min\_high\_g360 model. Assembly statistics were generated using a custom Python script, and single copy ortholog analysis was performed using BUSCO v5.2.2 [114], using the saccharomyces\_odb10 database.

### Identification of segmental aneuploidies

Raw long-reads were first aligned to the reference SC5314 genome using Minimap2 (v 2.17-r941) [112] and coverage plotted using Circos (v0.69–8) [115]. Raw reads sorting and indexing was performed with Samtools (v1.11) [116], bam to fasta conversion was conducted with bedtools (v2.30.0) [117] and visualised using IGV (v2.11.9). Presence of telomeres was confirmed by extracting raw reads at the target regions using samtools (v1.11). Individual long reads spanning the breakpoints were investigated and annotated in SnapGene Viewer.

### Supporting information

**S1 Fig. Genomic variants are selected in *ulp2Δ/Δ* cells challenged with Fluconazole.** (A) Whole genome sequence data were plotted as the log<sub>2</sub> ratio and converted to chromosome copy number (y-axis, 1–4 copies) as a function of chromosome position (x-axis, Chr1–ChrR) using YMAP. Heterozygous (AB) regions are indicated with gray shading and homozygous regions are indicated by haplotype AA (cyan) or BB (magenta). Allele ratio changes that occur within a CNV are indicated as dark blue (AAB) or purple (ABB). Colony B and C had allele ratio colouring that was corrected using IGV and allele frequency information. (B) Serial dilution assay of *ulp2Δ/Δ* parental (P) and fluconazole-recovered isolates (*FLC-2*, *FLC-3*, *FLC-4*,

*FLC-1a*, *FLC-1b* and *FLC-1c*) in non-selective (N/S) or media containing 128 µg/ml fluconazole (FLC).

(PDF)

**S1 Table. Genetic screen top hits (score  $\geq 2$ ).**

(DOCX)

**S2 Table. List of SNPs detected in the *ulp2Δ/Δ* colonies (U1, U2 and U3) sequenced in this study.**

(XLSX)

**S3 Table. List of SNPs detected in *ulp2Δ/Δ* isolates selected from Fluconazole (128 µg/ml) plates.**

(XLSX)

**S4 Table. Coordinates of the Chromosome 1 amplification (lin-Chr1) detected in the FLC-1 *ulp2Δ/Δ* isolate.**

(XLSX)

**S5 Table. Coordinates of the Chromosome R deletion (ChrRR-Deletion) detected in FLC-1, FLC-2, FLC-3 and FLC-4 *ulp2Δ/Δ* isolates.**

(XLSX)

**S6 Table. List of genes associated with "response to drugs" GO terms for the Chromosome 1 amplification (lin-Chr1).**

(XLSX)

**S7 Table. List of genes associated with "response to stress" and "response to drugs" GO terms for the Chromosome R deletion (ChrRR-deletion).**

(XLSX)

**S8 Table. Strains used in this study.**

(DOCX)

**S9 Table. Oligonucleotides used in this study.**

(DOCX)

**S10 Table. Plasmids used in this study.**

(DOCX)

## Acknowledgments

We thank J. Berman for reagents, strains and materials and A. Pidoux for critically reading the manuscript.

## Author Contributions

**Conceptualization:** Marzia Rizzo, Anna Selmecki, Alessia Buscaino.

**Data curation:** Natthapon Soisangwan, Robert Jordan Price.

**Formal analysis:** Anna Selmecki.

**Funding acquisition:** Anna Selmecki, Alessia Buscaino.

**Investigation:** Marzia Rizzo, Natthapon Soisangwan, Samuel Vega-Estevez, Robert Jordan Price, Chloe Uyl, Elise Iracane, Matt Shaw, Jan Soetaert, Anna Selmecki, Alessia Buscaino.



**Methodology:** Marzia Rizzo, Natthapon Soisangwan, Samuel Vega-Estevez, Jan Soetaert.

**Project administration:** Alessia Buscaino.

**Resources:** Samuel Vega-Estevez.

**Supervision:** Alessia Buscaino.

**Validation:** Marzia Rizzo, Jan Soetaert.

**Visualization:** Marzia Rizzo.

**Writing – original draft:** Alessia Buscaino.

**Writing – review & editing:** Marzia Rizzo, Natthapon Soisangwan, Samuel Vega-Estevez, Robert Jordan Price, Chloe Uyl, Elise Iracane, Matt Shaw, Anna Selmecki, Alessia Buscaino.

## References

1. Sui Y, Qi L, Wu JK, Wen XP, Tang XX, Ma ZJ, et al. Genome-wide mapping of spontaneous genetic alterations in diploid yeast cells. *Proc Natl Acad Sci U S A*. 2020; 117: 28191–28200. <https://doi.org/10.1073/pnas.2018633117> PMID: 33106417
2. Laureau R, Loeillet S, Salinas F, Bergström A, Legoix-Né P, Liti G, et al. Extensive Recombination of a Yeast Diploid Hybrid through Meiotic Reversion. *PLoS Genet*. 2016; 12(2):e1005781. <https://doi.org/10.1371/journal.pgen.1005781> PMID: 26828862
3. Sheltzer JM, Amon A. The aneuploidy paradox: Costs and benefits of an incorrect karyotype. *Trends in Genetics*. 2011; 27(11):446–53. <https://doi.org/10.1016/j.tig.2011.07.003> PMID: 21872963
4. Selmecki A, Forche A, Berman J. Genomic plasticity of the human fungal pathogen *Candida albicans*. *Eukaryot Cell*. 2010; 9: 991–1008. <https://doi.org/10.1128/EC.00060-10> PMID: 20495058
5. Zafar H, Altamirano S, Ballou ER, Nielsen K. A titanic drug resistance threat in *Cryptococcus neoformans*. *Curr Opin Microbiol*. 2019; 52: 158–164. <https://doi.org/10.1016/j.mib.2019.11.001> PMID: 31765991
6. Gerstein AC, Fu MS, Mukaremera L, Li Z, Ormerod KL, Fraser JA, et al. Polyploid titan cells produce haploid and aneuploid progeny to promote stress adaptation. *mBio*. 2015; 6: e01340–15. <https://doi.org/10.1128/mBio.01340-15> PMID: 26463162
7. Reis-Cunha JL, Valdivia HO, Bartholomeu DC. Gene and Chromosomal Copy Number Variations as an Adaptive Mechanism Towards a Parasitic Lifestyle in Trypanosomatids. *Curr Genomics*. 2018; 19(2):87–97. <https://doi.org/10.2174/1389202918666170911161311> PMID: 29491737
8. Stone NR, Rhodes J, Fisher MC, Mfinanga S, Kivuyo S, Rugemalila J, et al. Dynamic ploidy changes drive fluconazole resistance in human cryptococcal meningitis. *J Clin Invest*. 2019; 129: 999–1014. <https://doi.org/10.1172/JCI124516> PMID: 30688656
9. Pfaller MA, Diekema DJ. Epidemiology of invasive mycoses in North America. *Crit Rev Microbiol*. 2010; 36: 1–53. <https://doi.org/10.3109/10408410903241444> PMID: 20088682
10. Teoh F, Pavelka N. pathogens How Chemotherapy Increases the Risk of Systemic Candidiasis in Cancer Patients: Current Paradigm and Future Directions. 2016; 5(1): 6 <https://doi.org/10.3390/pathogens5010006> PMID: 26784236
11. Berman J, Krysan DJ. Drug resistance and tolerance in fungi. *Nat Rev Microbiol*. 2020; 18: 319–331. <https://doi.org/10.1038/s41579-019-0322-2> PMID: 32047294
12. Fisher MC, Hawkins NJ, Sanglard D, Gurr SJ. Worldwide emergence of resistance to antifungal drugs challenges human health and food security. *Science (1979)*. 2018; 360: 739–742. <https://doi.org/10.1126/science.aap7999> PMID: 29773744
13. Jones T, Federspiel NA, Chibana H, Dungan J, Kalman S, Magee BB, et al. The diploid genome sequence of *Candida albicans*. *Proc Natl Acad Sci U S A*. 2004; 101: 7329–34. <https://doi.org/10.1073/pnas.0401648101> PMID: 15123810
14. van het Hoog M, Rast TJ, Martchenko M, Grindle S, Dignard D, Hogues H, et al. Assembly of the *Candida albicans* genome into sixteen supercontigs aligned on the eight chromosomes. *Genome Biol*. 2007; 8: R52. <https://doi.org/10.1186/gb-2007-8-4-r52> PMID: 17419877
15. Wickes B, Staudinger J, Magee BB, Kwon-Chung K-J, Magee PT, Scherer S3. Physical and Genetic Mapping of *Candida albicans*: Several Genes Previously Assigned to Chromosome 1 Map to Chromosome R, the rDNA-Containing Linkage Group. *Infect Immun*. 1991; 59: 2480–2484. <https://doi.org/10.1128/iai.59.7.2480-2484.1991> PMID: 2050413

16. Ford CB, Funt JM, Abbey D, Issi L, Guiducci C, Martinez D a, et al. The evolution of drug resistance in clinical isolates of *Candida albicans*. *Elife*. 2015; 4: 1–27. <https://doi.org/10.7554/eLife.00662> PMID: 25646566
17. Hirakawa MP, Martinez DA, Sakthikumar S, Anderson MZ, Berlin A, Gujja S, et al. Genetic and phenotypic intra-species variation in *Candida albicans*. *Genome Res*. 2015; 25: 413–25. <https://doi.org/10.1101/gr.174623.114> PMID: 25504520
18. Hickman M a, Zeng G, Forche A, Hirakawa MP, Abbey D, Harrison BD, et al. The “obligate diploid” *Candida albicans* forms mating-competent haploids. *Nature*. 2013; 494: 55–9. <https://doi.org/10.1038/nature11865> PMID: 23364695
19. Todd RT, Wikoff TD, Forche A, Selmecki A. Genome plasticity in *Candida albicans* is driven by long repeat sequences. *Elife*. 2019; 8:e45954. <https://doi.org/10.7554/eLife.45954> PMID: 31172944
20. Tso GHW, Reales-Calderon JA, Tan ASM, Sem X, Le GTT, Tan TG, et al. Experimental evolution of a fungal pathogen into a gut symbiont. *Science*. 2018; 362: 589–595. <https://doi.org/10.1126/science.aat0537> PMID: 30385579
21. Forche A, Cromie G, Gerstein AC, Solis N V., Pisithkul T, Srifa W, et al. Rapid Phenotypic and Genotypic Diversification After Exposure to the Oral Host Niche in *Candida albicans*. *Genetics*. 2018; 209(3): 725–741. <https://doi.org/10.1534/genetics.118.301019> PMID: 29724862
22. Forche A, Magee PT, Selmecki A, Berman J, May G. Evolution in *Candida albicans* Populations During a Single Passage Through a Mouse Host. *Genetics*. 2009; 182: 799–811. <https://doi.org/10.1534/genetics.109.103325> PMID: 19414562
23. Ene I V., Farrer RA, Hirakawa MP, Agwamba K, Cuomo CA, Bennett RJ. Global analysis of mutations driving microevolution of a heterozygous diploid fungal pathogen. *Proc Natl Acad Sci U S A*. 2018; 115: E8688–E8697. <https://doi.org/10.1073/pnas.1806002115> PMID: 30150418
24. Forche A, Solis N V., Swidergall M, Thomas R, Guyer A, Beach A, et al. Selection of *Candida albicans* trisomy during oropharyngeal infection results in a commensal-like phenotype. *PLoS Genet*. 2019; 15(5):e1008137. <https://doi.org/10.1371/journal.pgen.1008137> PMID: 31091232
25. Ropars J, Maufrais C, Diogo D, Marcet-Houben M, Perin A, Sertour N, et al. Gene flow contributes to diversification of the major fungal pathogen *Candida albicans*. *Nat Commun*. 2018; 9(1):2253. <https://doi.org/10.1038/s41467-018-04787-4> PMID: 29884848
26. Selmecki A, Forche A, Berman J. Aneuploidy and isochromosome formation in drug-resistant *Candida albicans*. *Science*. 2006; 313: 367–70. <https://doi.org/10.1126/science.1128242> PMID: 16857942
27. Selmecki A, Gerami-Nejad M, Paulson C, Forche A, Berman J. An isochromosome confers drug resistance in vivo by amplification of two genes, *ERG11* and *TAC1*. *Mol Microbiol*. 2008; 68: 624–641. <https://doi.org/10.1111/j.1365-2958.2008.06176.x> PMID: 18363649
28. Anderson MZ, Saha A, Haseeb A, Bennett RJ. A chromosome 4 trisomy contributes to increased fluconazole resistance in a clinical isolate of *Candida albicans*. *Microbiology (Reading)*. 2017; 163: 856–865. <https://doi.org/10.1099/mic.0.000478> PMID: 28640746
29. Dunn MJ, Anderson MZ. To repeat or not to repeat: Repetitive sequences regulate genome stability in *Candida albicans*. *Genes (Basel)*. 2019; 10(11):866. <https://doi.org/10.3390/genes10110866> PMID: 31671659
30. Todd RT, Selmecki A. Expandable and reversible copy number amplification drives rapid adaptation to antifungal drugs. *Elife*. 2020; 9:e58349. <https://doi.org/10.7554/eLife.58349> PMID: 32687060
31. Freire-Benítez V, Gourlay S, Berman J, Buscaino A. Sir2 regulates stability of repetitive domains differentially in the human fungal pathogen *Candida albicans*. *Nucleic Acids Res*. 2016; 44(19):9166–9179. <https://doi.org/10.1093/nar/gkw594> PMID: 27369382
32. Buscaino. Chromatin-Mediated Regulation of Genome Plasticity in Human Fungal Pathogens. *Genes (Basel)*. 2019; 10: 855. <https://doi.org/10.3390/genes10110855> PMID: 31661931
33. Anderson MZ, Baller J a, Dulmage K, Wigen L, Berman J. The three clades of the telomere-associated TLO gene family of *Candida albicans* have different splicing, localisation and expression features. *Eukaryot Cell*. 2012; 11: 612–625. <https://doi.org/10.1128/EC.00230-12> PMID: 22923044
34. Haran J, Boyle H, Hokamp K, Yeomans T, Liu Z, Church M, et al. Telomeric ORFs (TLOs) in *Candida* spp. Encode Mediator Subunits That Regulate Distinct Virulence Traits. *PLoS Genet*. 2014; 10: e1004658. <https://doi.org/10.1371/journal.pgen.1004658> PMID: 25356803
35. Zhang A, Petrov KO, Hyun ER, Liu Z, Gerber SA, Myers LC. The Tlo proteins are stoichiometric components of *Candida albicans* mediator anchored via the Med3 subunit. *Eukaryot Cell*. 2012; 11: 874–84. <https://doi.org/10.1128/EC.00095-12> PMID: 22562472
36. Noble SM, French S, Kohn LA, Chen V, Johnson AD. Systematic screens of a *Candida albicans* homozygous deletion library decouple morphogenetic switching and pathogenicity. *Nat Genet*. 2010; 42: 590–598. <https://doi.org/10.1038/ng.605> PMID: 20543849

37. Hakem R. DNA-damage repair; the good, the bad, and the ugly. *EMBO Journal*. 2008; 27: 589–605. <https://doi.org/10.1038/emboj.2008.15> PMID: 18285820
38. Aboussekhra A, Wood RD. Repair of UV-damaged DNA by mammalian cells and *Saccharomyces cerevisiae*. *Curr Opin Genet Dev*. 1994; 4: 212–220. [https://doi.org/10.1016/s0959-437x\(05\)80047-4](https://doi.org/10.1016/s0959-437x(05)80047-4) PMID: 8032198
39. Beranek DT. Distribution of methyl and ethyl adducts following alkylation with monofunctional alkylating agents. *Mutation Research—Fundamental and Molecular Mechanisms of Mutagenesis*. 1990; 231: 11–30. [https://doi.org/10.1016/0027-5107\(90\)90173-2](https://doi.org/10.1016/0027-5107(90)90173-2) PMID: 2195323
40. Butler DK, Ali O, Govena J, Loveless T, Wilson T, Toenjes KA. The GRR1 gene of *Candida albicans* is involved in the negative control of pseudohyphal morphogenesis. *Fungal Genetics and Biology*. 2006; 43: 573–582. <https://doi.org/10.1016/j.fgb.2006.03.004> PMID: 16730201
41. McCoy KM, Tubman ES, Claas A, Tank D, Clancy SA, O'Toole ET, et al. Physical limits on kinesin-5-mediated chromosome congression in the smallest mitotic spindles. *Mol Biol Cell*. 2015; 26: 3999–4014. <https://doi.org/10.1091/mbc.E14-10-1454> PMID: 26354423
42. Weinert T. DNA damage checkpoints update: getting molecular. *Curr Opin Genet Dev*. 1998; 8: 185–193. [https://doi.org/10.1016/s0959-437x\(98\)80140-8](https://doi.org/10.1016/s0959-437x(98)80140-8) PMID: 9610409
43. di Caprio L, Cox BS. DNA synthesis in UV-irradiated yeast. *Mutation Research/Fundamental and Molecular Mechanisms of Mutagenesis*. 1981; 82: 69–85. [https://doi.org/10.1016/0027-5107\(81\)90139-1](https://doi.org/10.1016/0027-5107(81)90139-1) PMID: 7022172
44. Enjalbert B, Smith DA, Cornell MJ, Alam I, Nicholls S, Brown AJP, et al. Role of the Hog1 Stress-activated Protein Kinase in the Global Transcriptional Response to Stress in the Fungal Pathogen *Candida albicans*. *Mol Biol Cell*. 2006; 17(2):1018–32. <https://doi.org/10.1091/mbc.e05-06-0501> PMID: 16339080
45. Bhaumik SR, Green MR. Differential requirement of SAGA components for recruitment of TATA-box-binding protein to promoters in vivo. *Mol Cell Biol*. 2002; 22: 7365–7371. <https://doi.org/10.1128/MCB.22.21.7365-7371.2002> PMID: 12370284
46. Sterner DE, Belotserkovskaya R, Berger SL. SALSAs, a variant of yeast SAGA, contains truncated Spt7, which correlates with activated transcription. *Proc Natl Acad Sci U S A*. 2002; 99: 11622–11627. <https://doi.org/10.1073/pnas.182021199> PMID: 12186975
47. Sternberg PW, Stern MJ, Clark I, Herskowitz I. Activation of the yeast HO gene by release from multiple negative controls. *Cell*. 1987; 48: 567–577. [https://doi.org/10.1016/0092-8674\(87\)90235-2](https://doi.org/10.1016/0092-8674(87)90235-2) PMID: 3545494
48. Ferreira T, Brèthes D, Pinson B, Napias C, Chevallier J. Functional analysis of mutated purine-cytosine permease from *Saccharomyces cerevisiae*. A possible role of the hydrophilic segment 371–377 in the active carrier conformation. *Journal of Biological Chemistry*. 1997; 272: 9697–9702. <https://doi.org/10.1074/jbc.272.15.9697> PMID: 9092500
49. Rousselet G, Simon M, Ripoche P, Buhler JM. A second nitrogen permease regulator in *Saccharomyces cerevisiae*. *FEBS Lett*. 1995; 359: 215–219. [https://doi.org/10.1016/0014-5793\(95\)00038-b](https://doi.org/10.1016/0014-5793(95)00038-b) PMID: 7867803
50. ElBerry HM, Majumdar ML, Cunningham TS, Sumrada RA, Cooper TG. Regulation of the urea active transporter gene (DUR3) in *Saccharomyces cerevisiae*. *J Bacteriol*. 1993; 175: 4688–4698. <https://doi.org/10.1128/jb.175.15.4688-4698.1993> PMID: 8335627
51. Dove SK, McEwen RK, Mayes A, Hughes DC, Beggs JD, Michell RH. Vac14 controls PtdIns(3,5)P2 synthesis and Fab1-dependent protein trafficking to the multivesicular body. *Current Biology*. 2002; 12: 885–893. [https://doi.org/10.1016/s0960-9822\(02\)00891-6](https://doi.org/10.1016/s0960-9822(02)00891-6) PMID: 12062051
52. Webb GC, Zhang J, Garlow SJ, Wesp A, Riezman H, Jones EW. Pep7p provides a novel protein that functions in vesicle-mediated transport between the yeast Golgi and endosome. *Mol Biol Cell*. 1997; 8(5):871–95. <https://doi.org/10.1091/mbc.8.5.871> PMID: 9168472
53. De Virgilio C, Bürckert N, Neuhaus J-M, Boller T, Wiemken A. CNE1, a *Saccharomyces cerevisiae* Homologue of the Genes Encoding Mammalian Calnexin and Calreticulin. *Yeast*. 1993; 9: 185–188. <https://doi.org/10.1002/yea.320090209> PMID: 8465605
54. Yoshida S, Ohya Y, Goebel M, Nakano A, Anraku Y. A novel gene, STT4, encodes a phosphatidylinositol 4-kinase in the PKC1 protein kinase pathway of *Saccharomyces cerevisiae*. *Journal of Biological Chemistry*. 1994; 269: 1166–1171. [https://doi.org/10.1016/s0021-9258\(17\)42237-x](https://doi.org/10.1016/s0021-9258(17)42237-x) PMID: 8288577
55. Luo S, Hoffmann R, Skerka C, Zipfel PF. Glycerol-3-Phosphate Dehydrogenase 2 Is a Novel Factor H-, Factor H-like Protein 1-, and Plasminogen-Binding Surface Protein of *Candida albicans*. *J Infect Dis*. 2013; 207: 594–603. <https://doi.org/10.1093/infdis/jis718> PMID: 23204165
56. Herrero AB, Magnelli P, Mansour MK, Levitz SM, Bussey H, Abejón C. KRE5 gene null mutant strains of *Candida albicans* are avirulent and have altered cell wall composition and hypha formation

- properties. *Eukaryot Cell*. 2004; 3: 1423–1432. <https://doi.org/10.1128/EC.3.6.1423-1432.2004> PMID: 15590817
57. Bianchis V, Pontis E, Reichard P. THE JOURNAL OF BIOLOGICAL CHEMISTRY Changes of Deoxyribonucleoside Triphosphate Pools Induced by Hydroxyurea and Their Relation to DNA Synthesis. *Journal of Biological Chemistry*. 1986; 261: 16037–16042. [https://doi.org/10.1016/S0021-9258\(18\)66672-4](https://doi.org/10.1016/S0021-9258(18)66672-4)
  58. Huaping L, Jie L, Zhifeng W, Yingchang Z, Yuhuan L. Cloning and functional expression of ubiquitin-like protein specific proteases genes from *Candida albicans*. *Biol Pharm Bull*. 2007; 30: 1851–1855. <https://doi.org/10.1248/bpb.30.1851> PMID: 17917249
  59. Segal ES, Gritsenko V, Levitan A, Yadav B, Dror N, Steenwyk JL, et al. Gene Essentiality Analyzed by In Vivo Transposon Mutagenesis and Machine Learning in a Stable Haploid Isolate of *Candida albicans*. *mBio*. 2018; 9: e02048–18. <https://doi.org/10.1128/mBio.02048-18> PMID: 30377286
  60. Li SJ, Hochstrasser M. A new protease required for cell-cycle progression in yeast. *Nature*. 1999; 398: 246–251. <https://doi.org/10.1038/18457> PMID: 10094048
  61. Forche A, Abbey D, Pisithkul T, Weinzierl MA, Ringstrom T, Bruck D, et al. stress alters rates and types of loss of heterozygosity in *Candida albicans*. *mBio*. 2011; 2(4):e00129–11. <https://doi.org/10.1128/mBio.00129-11> PMID: 21791579
  62. O'Meara TR, Hay C, Price MS, Giles S, Alspaugh JA. *Cryptococcus neoformans* histone acetyltransferase Gcn5 regulates fungal adaptation to the host. *Eukaryot Cell*. 2010; 9(8):1193–202. <https://doi.org/10.1128/EC.00098-10> PMID: 20581290
  63. Loll-Krippelber R, d'Enfert C, Feri A, Diogo D, Perin A, Marcet-Houben M, et al. A study of the DNA damage checkpoint in *Candida albicans*: uncoupling of the functions of Rad53 in DNA repair, cell cycle regulation and genotoxic stress-induced polarised growth. *Mol Microbiol*. 2014; 91: 452–471. <https://doi.org/10.1111/mmi.12471> PMID: 24286230
  64. Legrand M, Chan CL, Jauert PA, Kirkpatrick DT. The contribution of the S-phase checkpoint genes MEC1 and SGS1 to genome stability maintenance in *Candida albicans*. *Fungal Genet Biol*. 2011; 48: 823–30. <https://doi.org/10.1016/j.fgb.2011.04.005> PMID: 21511048
  65. Berman J. Morphogenesis and cell cycle progression in *Candida albicans* *Curr. Opin Microbiology*. 2006; 9: 595–601. <https://doi.org/10.1016/j.mib.2006.10.007.Morphogenesis>
  66. Gerami-Nejad M, Zacchi LF, McClellan M, Matter K, Berman J. Shuttle vectors for facile gap repair cloning and integration into a neutral locus in *Candida albicans*. *Microbiology (United Kingdom)*. 2013; 159: 565–579. <https://doi.org/10.1099/mic.0.064097-0> PMID: 23306673
  67. Burrack LS, Applen Clancey SE, Chacón JM, Gardner MK, Berman J. Monopolin recruits condensin to organise centromere DNA and repetitive DNA sequences. *Mol Biol Cell*. 2013; 24: 2807–19. <https://doi.org/10.1091/mbc.E13-05-0229> PMID: 23885115
  68. Ryu HY, Wilson NR, Mehta S, Hwang SS, Hochstrasser M. Loss of the SUMO protease ULP2 triggers a specific multichromosome aneuploidy. *Genes Dev*. 2016; 30: 1881–1894. <https://doi.org/10.1101/gad.282194.116> PMID: 27585592
  69. Ryu HY, López-Giráldez F, Knight J, Hwang SS, Renner C, Kreft SG, et al. Distinct adaptive mechanisms drive recovery from aneuploidy caused by loss of the Ulp2 SUMO protease. *Nat Commun*. 2018; 9(1):5417. <https://doi.org/10.1038/s41467-018-07836-0> PMID: 30575729
  70. Arendrup MC, Friberg N, Mares M, Kahlmeter G, Meletiadis J, Guinea J, et al. How to interpret MICs of antifungal compounds according to the revised clinical breakpoints v. 10.0 European committee on antimicrobial susceptibility testing (EUCAST). *Clinical Microbiology and Infection*. 2020; 26: 1464–1472. <https://doi.org/10.1016/j.cmi.2020.06.007> PMID: 32562861
  71. Hendriks IA, Souza RCJ D', Yang B, Verlaan-De Vries M, Mann M, Vertegaal ACO. Uncovering global SUMOylation signaling networks in a site-specific manner. *Nat Struct Mol Biol* 2014; 21(10):927–36. <https://doi.org/10.1038/nsmb.2890> PMID: 25218447
  72. Esteras M, Liu IC, Snijders AP, Jarmuz A, Aragon L. Identification of SUMO conjugation sites in the budding yeast proteome. *Microbial Cell*. 2017; 4: 331. <https://doi.org/10.15698/mic2017.10.593> PMID: 29082231
  73. Wykoff DD, O'Shea EK. Identification of Sumoylated Proteins by Systematic Immunoprecipitation of the Budding Yeast Proteome. *Molecular & Cellular Proteomics*. 2005; 4: 73–83. <https://doi.org/10.1074/mcp.M400166-MCP200> PMID: 15596868
  74. Kähler JB, Tammsalu T, Jørgensen MM, Steen N, Hay RT, Thon G. Targeting of SUMO substrates to a Cdc48-Ufd1-Npl4 segregase and STUbL pathway in fission yeast. *Nat Commun*. 2015; 6:8827. <https://doi.org/10.1038/ncomms9827> PMID: 26537787

75. Garvin AJ, Morris JR. SUMO, a small, but powerful, regulator of double-strand break repair. *Philosophical Transactions of the Royal Society B: Biological Sciences*. 2017; 372(1731):20160281. <https://doi.org/10.1098/rstb.2016.0281> PMID: 28847818
76. Watts FZ. The role of SUMO in chromosome segregation. *Chromosoma*. 2007; 116: 15–20. <https://doi.org/10.1007/s00412-006-0079-z> PMID: 17031663
77. Cremona CA, Sarangi P, Zhao X. Sumoylation and the DNA Damage Response. *Biomolecules*. 2012; 2(3):376–388. <https://doi.org/10.3390/biom2030376> PMID: 24926426
78. Ryu HY, Ahn SH, Hochstrasser M. SUMO and cellular adaptive mechanisms. *Exp Mol Med*. 2020; 52: 931–939. <https://doi.org/10.1038/s12276-020-0457-2> PMID: 32591648
79. Felberbaum R, Hochstrasser M. Ulp2 and the DNA damage response: Desumoylation enables safe passage through mitosis. *Cell Cycle*. 2008; 7: 52–56. <https://doi.org/10.4161/cc.7.1.5218> PMID: 18196960
80. Schick M, Zhang L, Maurer S, Maurer HC, Isaakaidis K, Schneider L, et al. Genetic alterations of the SUMO isopeptidase SENP6 drive lymphomagenesis and genetic instability in diffuse large B-cell lymphoma. *Nat Commun*. 2022; 13(1):281 <https://doi.org/10.1038/s41467-021-27704-8> PMID: 35022408
81. Mitra S, Bodor DL, David AF, Abdul-Zani I, Mata JF, Neumann B, et al. Genetic screening identifies a SUMO protease dynamically maintaining centromeric chromatin. *Nat Commun*. 2020; 11(1):501. <https://doi.org/10.1038/s41467-019-14276-x> PMID: 31980633
82. Chang YC, Oram MK, Bielinsky AK. SUMO-Targeted Ubiquitin Ligases and Their Functions in Maintaining Genome Stability. *International Journal of Molecular Sciences* 2021; 22(10):5391. <https://doi.org/10.3390/ijms22105391> PMID: 34065507
83. Ohkuni K, Takahashi Y, Fulp A, Lawrimore J, Au WC, Pasupala N, et al. SUMO-targeted ubiquitin ligase (STUbL) Slx5 regulates proteolysis of centromeric histone H3 variant Cse4 and prevents its mislocalisation to euchromatin. *Mol Biol Cell*. 2016; 27: 1500–1510. <https://doi.org/10.1091/mbc.E15-12-0827> PMID: 26960795
84. Montpetit B, Hazbun TR, Fields S, Hieter P. Sumoylation of the budding yeast kinetochore protein Ndc10 is required for Ndc10 spindle localisation and regulation of anaphase spindle elongation. *Journal of Cell Biology*. 2006; 174: 653–663. <https://doi.org/10.1083/jcb.200605019> PMID: 16923829
85. Mukhopadhyay D, Arnaoutov A, Dasso M. The SUMO protease SENP6 is essential for inner kinetochore assembly. *Journal of Cell Biology*. 2010; 188: 681–692. <https://doi.org/10.1083/jcb.200909008> PMID: 20212317
86. Aragón L. The Smc5/6 complex: New and old functions of the enigmatic long-distance relative. *Annu Rev Genet*. 2018; 52: 89–107. <https://doi.org/10.1146/annurev-genet-120417-031353> PMID: 30476445
87. Branzei D, Sollier J, Liberi G, Zhao X, Maeda D, Seki M, et al. Ubc9- and Mms21-Mediated Sumoylation Counteracts Recombinogenic Events at Damaged Replication Forks. *Cell*. 2006; 127: 509–522. <https://doi.org/10.1016/j.cell.2006.08.050> PMID: 17081974
88. Dou H, Huang C, Singh M, Carpenter PB, Yeh ETH. Regulation of DNA Repair through De-SUMOylation and SUMOylation of Replication Protein A Complex. *Mol Cell*. 2010; 39(3):333–45. <https://doi.org/10.1016/j.molcel.2010.07.021> PMID: 20705237
89. Cremona CA, Sarangi P, Yang Y, Hang LE, Rahman S, Zhao X. Extensive DNA Damage-Induced Sumoylation Contributes to Replication and Repair and Acts in Addition to the Mec1 Checkpoint. *Mol Cell*. 2012; 45: 422–432. <https://doi.org/10.1016/j.molcel.2011.11.028> PMID: 22285753
90. Leach MD, Stead DA, Argo E, Brown AJP. Identification of sumoylation targets, combined with inactivation of SMT3, reveals the impact of sumoylation upon growth, morphology, and stress resistance in the pathogen *Candida albicans*. *Mol Biol Cell*. 2011; 22: 687–702. <https://doi.org/10.1091/mbc.E10-07-0632> PMID: 21209325
91. Brown AJP, Cowen LE, Di Pietro A, Quinn J. Stress Adaptation. 2017; 5(4):10.1128 <https://doi.org/10.1128/microbiolspec.FUNK-0048-2016> PMID: 28721857
92. Gaca AO, Lemos JA. Adaptation to Adversity: the Intermingling of Stress Tolerance and Pathogenesis in Enterococci. *Microbiology and Molecular Biology Reviews*. 2019; 83(3):e00008–19. <https://doi.org/10.1128/MMBR.00008-19> PMID: 31315902
93. MacPherson S, Akache B, Weber S, De Deken X, Raymond M, Turcotte B. *Candida albicans* zinc cluster protein Upc2p confers resistance to antifungal drugs and is an activator of ergosterol biosynthetic genes. *Antimicrob Agents Chemother*. 2005; 49: 1745–1752. <https://doi.org/10.1128/AAC.49.5.1745-1752.2005> PMID: 15855491



94. Silver PM, Oliver BG, White TC. Role of *Candida albicans* transcription factor Upc2p in drug resistance and sterol metabolism. *Eukaryot Cell*. 2004; 3: 1391–1397. <https://doi.org/10.1128/EC.3.6.1391-1397.2004> PMID: 15590814
95. Miller JE, Reese JC. Ccr4-Not complex: the control freak of eukaryotic cells. *Crit Rev Biochem Mol Biol*. 2012; 47(4):315–33. <https://doi.org/10.3109/10409238.2012.667214> PMID: 22416820
96. Hastings PJ, Ira G, Lupski JR. A microhomology-mediated break-induced replication model for the origin of human copy number variation. *PLoS Genet*. 2009; 5(1):e1000327 <https://doi.org/10.1371/journal.pgen.1000327> PMID: 19180184
97. Kukurudz RJ, Chapel M, Wonitowy Q, Adamu Bukari A-R, Sidney B, Sierhuis R, et al. Acquisition of cross-azole tolerance and aneuploidy in *Candida albicans* strains evolved to posaconazole. *G3 (Bethesda)*. 2022; 12(9):jkac156. <https://doi.org/10.1093/g3journal/jkac156> PMID: 35881695
98. Yang F, Gritsenko V, Futterman YS, Gao L, Zhen C, Lu H, et al. Tunicamycin potentiates antifungal drug tolerance via aneuploidy in *Candida albicans*. *mBio*. 2021; 12(4):e0227221. <https://doi.org/10.1128/mBio.02272-21> PMID: 34465026
99. Wilson RB, Davis D, Mitchell AP. Rapid hypothesis testing with *Candida albicans* through gene disruption with short homology regions. *J Bacteriol*. 1999; 181:1868–74. <https://doi.org/10.1128/JB.181.6.1868-1874.1999> PMID: 10074081
100. Von der Haar T. Optimized protein extraction for quantitative proteomics of yeasts. *PLoS One*. 2007; 2: e1078. <https://doi.org/10.1371/journal.pone.0001078> PMID: 17957260
101. Schwartz DC, Cantor CR. Separation of yeast chromosome-sized DNAs by pulsed field gradient gel electrophoresis. *Cell*. 1984; 37: 67–75. [https://doi.org/10.1016/0092-8674\(84\)90301-5](https://doi.org/10.1016/0092-8674(84)90301-5) PMID: 6373014
102. Bolger AM, Lohse M, Usadel B. Trimmomatic: a flexible trimmer for Illumina sequence data. *Bioinformatics*. 2014; 30: 2114–2120. <https://doi.org/10.1093/bioinformatics/btu170> PMID: 24695404
103. Li H. Aligning sequence reads, clone sequences and assembly contigs with BWA-MEM. *arXiv* 2013; <https://doi.org/10.48550/arXiv.1303.3997>
104. Li H, Durbin R. Fast and accurate short read alignment with Burrows-Wheeler transform. *Bioinformatics*. 2009; 25: 1754–1760. <https://doi.org/10.1093/bioinformatics/btp324> PMID: 19451168
105. Okonechnikov K, Conesa A, García-Alcalde F. Qualimap 2: advanced multi-sample quality control for high-throughput sequencing data. *Bioinformatics*. 2016; 32: 292–294. <https://doi.org/10.1093/bioinformatics/btv566> PMID: 26428292
106. Cibulskis K, Lawrence MS, Carter SL, Sivachenko A, Jaffe D, Sougnez C, et al. Sensitive detection of somatic point mutations in impure and heterogeneous cancer samples. *Nature Biotechnology* 2013; 31: 213–219. <https://doi.org/10.1038/nbt.2514> PMID: 23396013
107. Cingolani P, Platts A, Wang LL, Coon M, Nguyen T, Wang L, et al. A program for annotating and predicting the effects of single nucleotide polymorphisms, SnpEff: SNPs in the genome of *Drosophila melanogaster* strain w1118; iso-2; iso-3. *Fly (Austin)*. 2012; 6: 80–92. <https://doi.org/10.4161/fly.19695> PMID: 22728672
108. Thorvaldsdóttir H, Robinson JT, Mesirov JP. Integrative Genomics Viewer (IGV): high-performance genomics data visualisation and exploration. *Brief Bioinform*. 2013; 14: 178–192. <https://doi.org/10.1093/bib/bbs017> PMID: 22517427
109. Abbey D a, Funt J, Lurie-Weinberger MN, Thompson D a, Regev A, Myers CL, et al. YMAP: a pipeline for visualisation of copy number variation and loss of heterozygosity in eukaryotic pathogens. *Genome Med*. 2014; 6: 1–15. <https://doi.org/10.1186/s13073-014-0100-8> PMID: 25505934
110. De Coster W, D'Hert S, Schultz DT, Cruts M, Van Broeckhoven C. NanoPack: visualising and processing long-read sequencing data. *Bioinformatics*. 2018; 34: 2666–2669. <https://doi.org/10.1093/BIOINFORMATICS/BTY149> PMID: 29547981
111. Chen Y, Nie F, Xie SQ, Zheng YF, Dai Q, Bray T, et al. Efficient assembly of nanopore reads via highly accurate and intact error correction. *Nat Commun*. 2021; 12. <https://doi.org/10.1038/S41467-020-20236-7> PMID: 33397900
112. Li H. Minimap2: pairwise alignment for nucleotide sequences. *Bioinformatics*. 2018; 34: 3094–3100. <https://doi.org/10.1093/bioinformatics/bty191> PMID: 29750242
113. Vaser R, Sović I, Nagarajan N, Šikić M. Fast and accurate de novo genome assembly from long uncorrected reads. *Genome Res*. 2017; 27: 737–746. <https://doi.org/10.1101/gr.214270.116> PMID: 28100585
114. Simão FA, Waterhouse RM, Ioannidis P, Kriventseva E V., Zdobnov EM. BUSCO: Assessing genome assembly and annotation completeness with single-copy orthologs. *Bioinformatics*. 2015; 31: 3210–3212. <https://doi.org/10.1093/bioinformatics/btv351> PMID: 26059717

115. Krzywinski M, Schein J, Birol I, Connors J, Gascoyne R, Horsman D, et al. Circos: An information aesthetic for comparative genomics. *Genome Res.* 2009; 19: 1639–1645. <https://doi.org/10.1101/gr.092759.109> PMID: 19541911
116. Li H, Handsaker B, Wysoker A, Fennell T, Ruan J, Homer N, et al. The Sequence Alignment/Map format and SAMtools. *Bioinformatics.* 2009; 25: 2078–2079. <https://doi.org/10.1093/bioinformatics/btp352> PMID: 19505943
117. Smith D, Quinlan A. Rapid whole-genome mutational profiling using next-generation sequencing technologies. *Genome Res.* 2008; 18(10):1638–42 <https://doi.org/10.1101/gr.077776.108> PMID: 18775913
